1 **A tissue-specific self-interacting chromatin domain forms independently of enhancer-**  
2 **promoter interactions**

3

4 Jill M Brown<sup>1</sup>, Nigel A Roberts<sup>1</sup>, Bryony Graham<sup>1</sup>, Dominic Waithe<sup>2</sup>, Christoffer Lagerholm<sup>2</sup>,  
5 Jelena M Telenius<sup>1</sup>, Sara De Ornellas<sup>1</sup>, A Marieke Oudelaar<sup>1</sup>, Izabela Szczerbal<sup>1&</sup>, Christian  
6 Babbs<sup>1</sup>, Mira T Kassouf<sup>1</sup>, Jim R Hughes<sup>1</sup>, Douglas R Higgs<sup>1</sup> & Veronica J Buckle<sup>1\*</sup>

7

8 <sup>1</sup> MRC Molecular Haematology Unit, MRC Weatherall Institute of Molecular Medicine, Oxford  
9 OX3 9DS, UK

10

11 <sup>2</sup> Wolfson Imaging Facility, MRC Weatherall Institute of Molecular Medicine, Oxford OX3 9DS,  
12 UK

13

14 <sup>&</sup> Current Address: Department of Genetics and Animal Breeding, Poznan University of Life  
15 Sciences, Poznan, Poland

16

17

18

19

20

21

22

23

24

25

26

27

28 Correspondence should be addressed to V.J.B. ([veronica.buckle@imm.ox.ac.uk](mailto:veronica.buckle@imm.ox.ac.uk)).

29 A variety of self-interacting domains, defined at different levels of resolution, have been  
30 described in mammalian genomes. These include Chromatin Compartments (A and B)<sup>1</sup>,  
31 Topologically Associated Domains (TADs)<sup>2,3</sup>, contact domains<sup>4,5</sup>, sub-TADs<sup>6</sup>, insulated  
32 neighbourhoods<sup>7</sup> and frequently interacting regions (FIREs)<sup>8</sup>. Whereas many studies  
33 have found the organisation of self-interacting domains to be conserved across cell  
34 types<sup>3,8,9</sup>, some do form in a lineage-specific manner<sup>6,7,10</sup>. However, it is not clear to  
35 what degree such tissue-specific structures result from processes related to gene  
36 activity such as enhancer-promoter interactions or whether they form earlier during  
37 lineage commitment and are therefore likely to be prerequisite for promoting gene  
38 expression. To examine these models of genome organisation in detail, we used a  
39 combination of high-resolution chromosome conformation capture, a newly-developed  
40 form of quantitative fluorescence *in-situ* hybridisation and super-resolution imaging to  
41 study a 70 kb self-interacting domain containing the mouse  $\alpha$ -globin locus. To  
42 understand how this self-interacting domain is established, we studied the region when  
43 the genes are inactive and during erythroid differentiation when the genes are  
44 progressively switched on. In contrast to many current models of long-range gene  
45 regulation, we show that an erythroid-specific, decompacted self-interacting domain,  
46 delimited by convergent CTCF/cohesin binding sites, forms prior to the onset of robust  
47 gene expression. Using previously established mouse models we show that formation  
48 of the self-interacting domain does not rely on interactions between the  $\alpha$ -globin genes  
49 and their enhancers. As there are also no tissue-specific changes in CTCF binding, then  
50 formation of the domain may simply depend on the presence of activated lineage-  
51 specific cis-elements driving a transcription-independent mechanism for opening  
52 chromatin throughout the 70 kb region to create a permissive environment for gene  
53 expression. These findings are consistent with a model of loop-extrusion in which all  
54 segments of chromatin, within a region delimited by CTCF boundary elements, can  
55 contact each other. Our findings suggest that activation of tissue-specific element(s)

56 **within such a self-interacting region is sufficient to influence all chromatin within the**  
57 **domain.**

58 The mouse  $\alpha$ -globin cluster is contained within a well-characterised 70kb self-interacting  
59 domain in which we have previously identified all *cis*-acting elements, including promoters,  
60 enhancers and CTCF/cohesin binding sites (Fig. 1)<sup>11</sup>. In mES cells the  $\alpha$ -globin promoters  
61 and five enhancers are not bound by transcription factors and the genes are silent<sup>12</sup>. Further,  
62 we detect no evidence of a strong self-interacting domain in mES cells, whereas such a  
63 structure is clearly present in differentiating erythroblasts<sup>10</sup>. Yet the largely convergent  
64 boundary elements are occupied by CTCF and cohesin in both cell types<sup>13</sup>, suggesting that  
65 CTCF/cohesin are not the primary mediators of this tissue-specific domain formation. To  
66 determine the relationship between activation of the  $\alpha$ -globin gene cluster and formation of a  
67 self-interacting domain, we examined fetal liver cells from E12.5 mice (MFL), cultured and  
68 harvested *ex-vivo* at two stages of differentiation. Initially (MFL 0h) the cells correspond to pro-  
69 erythroblasts in which all *cis*-elements are bound by transcription factors but there is little or  
70 no  $\alpha$ -globin expression. After 30 hours (MFL 30h), corresponding to intermediate  
71 erythroblasts, the  $\alpha$ -globin genes are fully active and transcribed at maximal levels (Fig. 1a, b).  
72 NG Capture-C analysis of chromatin interaction frequency<sup>10</sup> at the  $\alpha$ -globin locus in MFL 0h  
73 and 30h populations indicates that the  $\alpha$ -globin self-interacting domain is present and  
74 apparently equivalent in both populations (Fig. 1c). NG Capture-C analysis from one of the  
75 flanking CTCF/cohesin binding sites (-39.5) at the border of the domain shows that this site  
76 does not interact with the enhancers and promoters within the self-interacting domain but  
77 rather with the convergent CTCF/cohesin binding sites on the opposite side of the domain, at  
78 both 0h and 30h time points. Concordant with evidence in neural development<sup>14</sup>, we conclude  
79 that the  $\alpha$ -globin self-interacting domain, which is absent in mouse ES cells<sup>10</sup> (Extended Data  
80 Fig. 1), is already formed at an early stage of erythroid differentiation, prior to the onset of  
81 robust  $\alpha$ -globin transcription.

82 Rather than discrete contacts between elements, NG Capture-C has demonstrated that the  
83  $\alpha$ -globin self-interacting domain reflects interactions between all sequences within a 70kb  
84 region of chromatin lying between CTCF boundaries<sup>10,11</sup>. This generally increased contact  
85 frequency could reflect a spatially confined volume or alternatively a more dynamically  
86 interactive region of chromatin. As 3C data only quantify the ligations between juxtaposed  
87 chromatin segments in a population of cells, they do not distinguish between these two  
88 possibilities. Guided by the 3C interaction frequency data, we positioned panels of FISH  
89 probes across the  $\alpha$ -globin locus, allowing us to determine the changes in 3D structure of this  
90 locus during erythroid differentiation at single cell level, and the roles that key *cis*-sequences  
91 play in forming the self-interacting domain.

92 For FISH probes, we used a BAC (COMP) precisely covering the  $\alpha$ -globin self-interacting  
93 domain, and two BACs (F1 and F2) flanking this region (Fig. 2). We also designed smaller  
94 (~7kb) plasmid probes (Ex, E, A, C and Cx) to analyse chromatin organisation in finer detail.  
95 The Anchor 'A' probe was located at the distal extremity of the domain and is the nearest  
96 region of unique sequence adjacent to the  $\alpha$ -globin genes. All measurements involving the  
97 plasmid probes were made relative to this position. 'Ex' defines the proximal edge of the  
98 domain and 'E' was sited at the two major enhancer elements MCS-R1 and MCS-R2. Two  
99 control probes ('C' and 'Cx') were positioned outside of the self-interacting domain, in a region  
100 showing little interaction by NG Capture-C with the  $\alpha$ -globin genes or their enhancers. These  
101 control probes are equidistant in linear sequence to A as upstream probes E and Ex  
102 respectively. Prior to the FISH experiments, we performed NG Capture-C on MFL 30h  
103 erythroblasts and mES cells using capture oligonucleotides corresponding to the central points  
104 of each plasmid probe, to determine the interactions they detect across the locus (Extended  
105 Data Fig. 1). FISH with this probe panel then allowed us to measure 3D distances and  
106 volumes occupied by the chromatin within and outside the  $\alpha$ -globin domain in single cells.

107 To ensure that we preserved nuclear structure of the cells being analysed, we developed a  
108 method Raser-FISH (Resolution After Single-strand Exonuclease Resection) for labeling  
109 chromosomal loci without denaturing the DNA (see Methods). Using COMP, F1 and F2, we  
110 used this approach to measure inter-probe distances in mES cells and MFL 0h and 30h  
111 erythroblasts with three paired combinations (COMP-F1, COMP-F2 and F1-F2) (Fig. 2a, b).  
112 We found no significant differences between COMP-F1 or COMP-F2 in mES cells, MFL 0h  
113 and MFL 30h erythroblasts (Fig. 2c and Extended Data Fig. 2). However, we noted that  
114 although the linear genomic distance between F1 and F2 is twice that of COMP-F1 or COMP-  
115 F2, the median inter-probe distances between F1 and F2 are nevertheless shorter at MFL 0h  
116 (Fig. 2c). Importantly at MFL 30h, we observed a further, highly significant shortening of F1-  
117 F2 measurements compared to COMP-F1 and COMP-F2 (Fig. 2c). By contrast, there is no  
118 significant difference between distance measurements for the three probe pairs in mES cells.  
119 To analyse this further, we calculated the Pearson's correlation for the BAC signal pairs to  
120 estimate the degree of signal overlap. There is marked overlap between F1 and F2 signals at  
121 0h (median coefficients 0.6-0.61) and further overlap at 30h (median coefficients 0.66-0.75) in  
122 contrast to mES cells (median coefficient 0.43). Thus it appears that as erythroblasts  
123 differentiate and transcription is up-regulated, the flanking regions of the self-interacting  
124 domain are more frequently found in close proximity.

125 Volume measurements of probe signals can distinguish between a compact structure and a  
126 decompacted, dynamically interacting region. The genomic length of the COMP probe is 64 kb  
127 compared to 139 kb for both F1 and F2. The volume of the COMP BAC signal was greater at  
128 MFL 0h than F1 or F2 and the difference increased at MFL 30h. By contrast in mES cells, the  
129 three sets of volume measurements were comparable (Fig. 2d). This indicates that chromatin  
130 within the domain becomes less compact during differentiation relative to surrounding  
131 chromatin by MFL 0h and decompacts further during subsequent erythroid differentiation to  
132 consolidate the three-dimensional distinction of this self-interacting domain.

133 To further test these observations, we used the precisely positioned pairs of plasmid probes  
134 (A-E, A-C, A-Ex, and A-Cx), to analyse intra-chromosomal distances in mES and erythroid  
135 cells (Extended Data Fig. 3, 4). As for the BAC probes, we found no significant differences in  
136 mES cells between measurements across the self-interacting domain versus the control region  
137 (A-Ex versus A-Cx). This finding is supported by NG Capture-C data from the viewpoints of all  
138 five plasmid probes where only immediate proximity interactions are detected (Extended Data  
139 Fig. 1), indicating that no domain of interaction is present at this site in mES cells. Analysing  
140 early erythroblasts (MFL 0h), although we find no difference in the median measurements  
141 between A-E and A-C, we do find significant difference between A-Ex and A-Cx  
142 measurements, in agreement with NG Capture-C data (Fig. 1) where interaction frequencies  
143 indicate that the  $\alpha$ -globin domain has already formed. In intermediate erythroblasts (MFL 30h)  
144 when the  $\alpha$ -globin genes are fully active, the difference becomes highly significant for A-Ex  
145 versus A-Cx, and with A more frequently closer to Ex and to E, whilst distances between A to  
146 C and to Cx increase. These data indicate that even when the  $\alpha$ -globin genes are silent or  
147 minimally active, proximity has already been established between the extremities of the self-  
148 interacting domain. In intermediate erythroblasts when >80% of the  $\alpha$ -genes are highly active,  
149 the extremities are yet more frequently in close proximity, supporting the concept of a  
150 dynamically looped domain where sites A and Ex sit in regions defining the borders of  
151 generalised interactions. Importantly, the persistence of the spread of the distance  
152 measurements observed from individual loci throughout differentiation (Extended Data Figs. 1  
153 and 4) implies that this self-interacting domain is not a static loop but rather a dynamic  
154 structure that exists in different conformations at any one time point, in agreement with a  
155 proposed model based on CTCF/cohesin complex dynamics<sup>15</sup>.

156 To visualize this region at the highest possible resolution we analysed erythroblasts using  
157 Stimulated Emission Depletion (STED) imaging<sup>16</sup>. As probes, we used the COMP BAC, which  
158 precisely corresponds to the self-interacting domain and the two flanking plasmid probes (A  
159 and Ex), detecting the extremities of the domain (Fig. 3a). In 24 out of 35 erythroblast nuclei,

160 the signals for A and Ex were juxtaposed or overlapping, with the COMP signal distinctly to the  
161 side or wrapped around them (Fig. 3b).

162 Based on all the data above, we present a model (Fig. 3c) for the formation of an active  
163 regulatory domain at an early stage of erythropoiesis, with the self-interacting domain  
164 boundaries and external flanking chromatin frequently sited closer together and chromatin  
165 within the domain becoming less compact relative to surrounding regions. These features  
166 become more pronounced over the course of erythroid differentiation. Notably, NG Capture-C  
167 from the control sites C and Cx shows their avoidance of the  $\alpha$ -globin domain but does detect  
168 infrequent interactions between the flanking chromatin regions (Extended Data Fig. 5),  
169 suggesting low frequency contacts of surrounding chromatin caused by formation of the  
170 domain.

171 It has been proposed that self-interacting domains might result from specific interactions  
172 between enhancers, promoters and CTCF/cohesin elements<sup>17-19</sup>. Recent data<sup>13</sup>, together with  
173 the evidence presented here, show that rather than interacting directly with the  $\alpha$ -globin  
174 enhancers and promoters, the flanking CTCF sites appear to avoid these elements: in fact,  
175 each shows interaction with the opposite flanking regions. NG Capture-C analysis indicates  
176 that the self-interacting domain still forms in engineered mice with a homozygous double  
177 knockout of the two major  $\alpha$ -globin enhancers (DKO for MCS-R1 and MCS-R2), although  
178 interactions within the domain appear somewhat reduced<sup>20</sup>. Here we examined inter-probe  
179 distances in erythroblasts from such mice in which nascent transcription from the  $\alpha$ -globin  
180 locus is reduced by 90%. This showed that a self-interacting domain still forms in the absence  
181 of the major enhancers (Fig. 4a). Notably we found a highly significant overlap of F1 with F2  
182 signals calculated by Pearson's correlation (coefficients WT 0.75 and DKO 0.67) when  
183 compared to COMP with F1 or F2 (coefficients WT 0.46 and DKO 0.46). For plasmid  
184 hybridisations, there was also a significant difference in distance measurements for both A-E  
185 versus A-C and A-Ex versus A-Cx. (Fig. 4c, Extended Data Fig. 6a, b). This indicates that the

186 structure we detect in WT erythroblasts, where the extremities of the domain come together, is  
187 recapitulated in the double enhancer knockout despite the physical absence of the core  
188 binding sites of the two enhancers and the severe reduction in transcriptional output from the  
189  $\alpha$ -globin genes. We next analysed erythroblasts from a mouse homozygous for a 16kb  
190 deletion that removes both  $\alpha$ -globin genes from each chromosome (AMKO), consequently  
191 there is no adult  $\alpha$ -globin transcription at all. As for WT, we found a significant difference in  
192 measurements within and outside of the self-interacting domain (Fig. 4d, Extended Data Fig.  
193 6c) and this is matched by NG Capture-C analysis, which still detects a definable self-  
194 interacting domain in the absence of the  $\alpha$ -globin genes (Fig. 4e). Here again we see evidence  
195 that the domain structure still forms, this time in the absence of the  $\alpha$ -globin promoters and of  
196 transcription from the  $\alpha$ -globin genes.

197 Finally we asked whether transcriptional up-regulation at the  $\alpha$ -globin locus is directly related  
198 to chromatin decompaction within the self-interacting domain. Volume measurements of the  
199 FISH signal generated using the COMP probe, together with the two flanking probes F1 and  
200 F2, indicate that the chromatin within the domain is decompacted compared to the flanking  
201 regions in both wild-type and DKO knockout cells (Fig. 4b). Hence, within the domain,  
202 chromatin decompaction is uncoupled from transcriptional upregulation of the  $\alpha$ -globin genes,  
203 indicating a response to earlier events at the locus. Decompaction of chromatin has also been  
204 uncoupled from enhancer-promoter interaction at the *Shh* locus in mice<sup>21</sup>.

205 In contrast to many current models of long-range gene regulation, we have shown, using a  
206 combination of NG Capture-C, quantitative FISH and super-resolution microscopy, that an  
207 erythroid specific decompacted self-interacting domain, delimited by convergent  
208 CTCF/cohesin binding sites forms prior to gene up-regulation and does not rely on interactions  
209 between the  $\alpha$ -globin genes and their enhancers or detectable tissue-specific changes in  
210 CTCF binding<sup>13</sup>. Our findings therefore suggest that formation of the domain more simply  
211 depends on the presence of activated lineage-specific cis-elements driving a transcription-



212 independent mechanism for opening chromatin. Certainly dCas9 gene activation alone has  
213 been shown to be insufficient to create a domain structure<sup>14</sup>, and in *Drosophila* more generally,  
214 TAD formation can arise independently of transcription<sup>22</sup>. Our findings could be explained by  
215 the recently proposed mechanism of chromatin loop extrusion<sup>23-25</sup>. This is thought to be an  
216 active process in which a loop-extruding factor, containing two DNA-encompassing units such  
217 as cohesin, associates with chromatin and travels along the chromatin fibre in opposite  
218 directions, creating a progressively larger intervening loop, until the factor is stalled at  
219 appropriately orientated CTCF-bound elements. This model would explain our observations  
220 that CTCF/cohesin sites flanking the  $\alpha$ -globin self-interacting domain become juxtaposed  
221 around a decompacted loop of chromatin in erythroblasts. In this model, domains could arise  
222 from a dynamic balance of cohesin loading and removal and loop extrusion and blocking<sup>26</sup>.  
223 We have previously noted an accumulation of cohesin in erythroid cells around all five  
224 enhancer-like elements of the  $\alpha$ -globin cluster<sup>13</sup>, which may act as entry points for cohesin. In  
225 this study, the remaining erythroid-specific elements in the absence of MCS-R1, MCS-R2 and  
226  $\alpha$ -globin genes are MCS-R3, MCS-R4 and Rm, which could play a redundant role in the  
227 formation of the self-interacting domain. This would explain a role for cis-elements like MCS-  
228 R3 and -Rm, which have the signature of enhancers but without obvious enhancer activity<sup>20</sup>,  
229 that is distinct from, and is active prior to, gene up-regulation. In this scenario and compatible  
230 with our data, the boundary elements of the domain are dynamically brought into proximity as  
231 a **result** of loop extrusion or similar mechanism, rather than initiating the formation of a self-  
232 interacting domain.

233

## 234 **Methods**

235 **Animal Procedure.** The mutant and wild type mouse strains reported in this study were  
236 maintained on a mixed background and were generated and phenotyped in accordance with  
237 Animal [Scientific Procedures] Act 1986, with procedures reviewed by the clinical medicine  
238 Animal Welfare and Ethical Review Body (AWERB), and conducted under project licence PPL

239 30/3339. All animals were singly housed, provided with food and water *ad libitum* and  
240 maintained on a 12 h light: 12 h dark cycle (150–200 lux cool white LED light, measured at the  
241 cage floor). Mice were given neutral identifiers and analysed by research technicians unaware  
242 of mouse genotype during outcome assessment.

243 **Cell Culture.** Erythropoiesis can be faithfully recapitulated *ex vivo* where progenitor cells  
244 differentiate down an erythroid pathway, making all necessary proteins for red cell function, to  
245 a late stage when the nucleus condenses and is finally extruded from the cell. *Ex vivo* culture  
246 of foetal liver cells from E12.5 mice (MFL) allows us to access erythroblasts at an early stage  
247 of differentiation with low levels of globin transcription (MFL 0h) and at an intermediate stage  
248 when erythroblasts are at peak transcription of the globin genes (MFL 30h). Previous analysis  
249 of chromatin conformation at the  $\alpha$ -globin locus has used Ter119-positive erythroblasts derived  
250 from adult spleen to represent the  $\alpha$ -globin-on population<sup>10,13</sup>. Data derived from these cells  
251 and from MFL 30h erythroblast cultures are comparable (Extended Data Fig. 7). Our *in vitro*  
252 mouse foetal liver (MFL) culturing system is based on previous protocols<sup>27,28</sup>. Briefly, MFL  
253 cells, taken at E12.5, were cultured in StemPro medium (Invitrogen) supplemented with Epo (1  
254 U/mL) (Janssen, PL 00242/029), SCF (50 ng/mL) (Peprotech, 250-03), dexamethasone (1 $\mu$ M)  
255 (Hameln, DEXA3.3) and 1x L-Glutamine (Invitrogen) for 6-7d to expand the erythroid  
256 progenitor population. Cells were differentiated, over a 30 h period in StemPro medium  
257 supplemented with Epo (5 U/mL) (Janssen, PL 00242/029) and transferrin (0.5 mg/mL)  
258 (Sigma, T0665) to a late stage of erythropoiesis. Foetal liver material was obtained from mice  
259 that are wild-type, DKO (where both MCS-R1 and MCS-R2 are deleted)<sup>20</sup>, or AMKO (where  
260 both  $\alpha$ -globin genes are removed)<sup>29</sup>. Mouse ES cell line, E14, was cultured in GMEM  
261 (Invitrogen) supplemented 10% (vol/vol) FBS (Gibco®, 10270) and LIF and grown in  
262 gelatinised flasks. C127, a mouse mammary epithelial cell line, was cultured in DMEM  
263 (Invitrogen) supplemented with 10% (vol/vol) FBS (Sigma), 1x penicillin/streptomycin  
264 (Invitrogen) and 1x L-glutamine (Invitrogen). MEL, the mouse erythroleukemia cell line, was  
265 cultured in RPMI (Invitrogen) supplemented with 10% (vol/vol) FBS (Sigma), 1x  
266 penicillin/streptomycin (Invitrogen) and 1x L-glutamine (Invitrogen). Mouse embryonic

267 fibroblasts (MEF) were cultured in DMEM (Invitrogen) supplemented with 15% (vol/vol) FBS  
268 (Gibco®), 1x penicillin/streptomycin (Invitrogen), 1x L-glutamine (Invitrogen) and 1x NEAA  
269 (Invitrogen). All cells were incubated at 37°C in a humidified 5% (vol/vol) CO<sub>2</sub> incubator. None  
270 of the cell lines used here are found in the database of commonly misidentified cell lines that is  
271 maintained by ICLAC and NCBI Biosample.

272 **Fluorescence activated cell sorting.** Defined cell populations were obtained as follows;  
273 expanded MFL cells were depleted of differentiated erythroid Ter119+ve cells by staining with  
274 Ter119 antibody (Becton Dickinson, 553673) and separation using MACS column (Miltenyi  
275 Biotec Ltd). Ter119-ve cells were then stained and sorted for CD44 (Becton Dickinson,  
276 561862) and cell size (Fig. 1a). This gave an early erythroid progenitor population. Following  
277 30 h culturing in differentiation medium, intermediate erythroblasts were obtained.  
278 Differentiation status was monitored by cyto-spin, and level of  $\alpha$ -globin nascent transcript was  
279 assessed by RT-qPCR (Fig. 1b).

280 **Reverse Transcription qPCR (RT-qPCR).** Isolation of total RNA was performed by lysing 10<sup>7</sup>  
281 cells in TRI reagent (Sigma), according to the manufacturer's instructions. To remove genomic  
282 DNA from RNA samples, samples were treated with TURBO™ DNase according to  
283 manufacturer's protocol (Invitrogen, AM2238). To assess relative changes in gene expression  
284 by qPCR, 1  $\mu$ g of total RNA was used for cDNA synthesis using Superscript™ II reverse  
285 transcriptase (Invitrogen, 18064014). Quantification of mRNA levels was performed using  
286 SYBR® Green Real Time PCR master mix according to manufacturers instructions (Applied  
287 Biosystems, 4309155). The relative standard curve method was used for relative quantitation  
288 of RNA abundance.

289 **Next-generation Capture-C (NG Capture-C).** Performed as previously described<sup>10</sup>. Material  
290 was obtained from mES E14 cells and MFL cells (0h and 30h) from WT and AMKO. Briefly, 3C  
291 libraries were generated using standard methods similar to the protocol for *in situ* Hi-C. Before  
292 oligonucleotide capture, 3C libraries were sonicated to a fragment size of 200 bp and Illumina  
293 paired-end sequencing adaptors (New England BioLabs, E6040, E7335 and E7500) were  
294 added using Herculase II polymerase (Agilent). Samples were indexed, allowing multiple

295 samples to be pooled before oligonucleotide capture using biotinylated DNA oligonucleotides  
296 designed for the  $\alpha$ -globin genes Hba1/2, the *MCS-R1* and *-R2* regulatory elements, CTCF -  
297 39.5 (Sigma Aldrich) and the five FISH probe sites Ex, E, A, C, Cx (ATDBio Ltd). The first  
298 hybridisation reaction was scaled up relative to the number of samples included in the reaction  
299 to maintain library complexity using Nimblegen SeqCap EZ Hybridization and Wash Kit  
300 (Roche, 05634261001). After a 72 h hybridisation step, streptavidin bead pulldown (Invitrogen,  
301 65305) was performed, followed by multiple bead washes using Nimblegen SeqCap EZ  
302 Hybridization and Wash Kit (Roche, 05634261001) followed by PCR amplification of the  
303 captured material using SeqCap EZ accessory Kit v2 (Roche, 07145594001). A second  
304 capture step was performed as above, with the exception that it was carried out in a single-  
305 volume reaction. The material was sequenced using the Illumina® MiSeq platform with 150-bp  
306 paired-end reads. Data were analyzed using scripts available at  
307 <https://bitbucket.org/telenius/CCseqBasic> and R was used to normalize data and generate  
308 differential tracks.

309 **Probes and nick-translation labelling.** For FISH; plasmid probes used were pEx (mm9;  
310 chr11; 32129812-32136918), pE (mm9; chr11; 32146280-32153457), pA (mm9; chr11;  
311 32201016-32208529), pC (mm9; chr11; 32251235-32258747), pCX (mm9; chr11; 32275986-  
312 32282385). Probes were constructed in the pBlueScript plasmid by subcloning regions from  
313 mouse BAC RP23-469I8 and BAC RP24-278E18 by  $\lambda$ -red-mediated recombination<sup>30</sup>. Mouse  
314 BACs were as follows; F1 (RDB 4214 MSMg01-530C17), COMP (RDB 4214 MSMg01-  
315 276J20) engineered by  $\lambda$ -red-mediated recombination to give a final insert size covering mm9;  
316 chr11; 32137046-32200781, and F2 (RP24-278E18). All BACs were obtained from RIKEN<sup>31</sup>  
317 and BACPAC Resources Center (Children's Hospital Oakland Research Institute;  
318 <http://bacpac.chori.org>). FISH probes were labeled by nick translation as previously  
319 described<sup>32</sup>. Probes were directly or indirectly labeled by nick translation using Cy3-dUTP (GE  
320 Healthcare) and digoxigenin-11-dUTP (Roche).

321 **RASER-FISH.** The small size of the locus requires optimal preservation of 3D nuclear  
322 structure. However, conventional FISH requires heat denaturation disrupting fine details of

323 chromatin structure below 1 Mb<sup>33,34</sup>. Here we have successfully adapted the principle of  
324 chromosome orientation FISH (CO-FISH)<sup>35</sup>, to non-repetitive genomic loci. The resulting  
325 RASER (resolution after single-strand exonuclease resection)-FISH method maintains nuclear  
326 fine-scale structure by replacing heat denaturation with exonuclease digestion, and is suitable  
327 for high- and super-resolution imaging analysis. Line profiles across DAPI-stained nuclei after  
328 three separate treatments (immunofluorescence (IF), our standard 3D-FISH and RASER-  
329 FISH) indicated a loss of structure in the 3D-FISH nuclei that is not observed in the RASER-  
330 FISH nuclei when compared to IF only (Extended Data Fig. 8). When comparing RASER-FISH  
331 to 3D-FISH, hybridisation efficiency was similar for the two techniques (>90%), suggesting that  
332 exonuclease digestion around the alpha globin locus is extensive by this method. Briefly, cells  
333 were labelled overnight with BrdU/BrdC mix (3:1) at final conc of 10  $\mu$ M. Cells were fixed in 4%  
334 PFA (vol/vol) for 15 min and permeabilized in 0.2% Triton X-100 (vol/vol) for 10 min. Cells  
335 were then stained with Hoechst 33258 (0.5  $\mu$ g/mL in PBS), exposed to 254 nm wavelength UV  
336 light for 15 min, then treated with Exonuclease III (NEB) at final conc 5 U/ $\mu$ L at 37°C for 15  
337 min. Labelled probes (100 ng each) were denatured in hybridization mix at 90°C for 5 min,  
338 BACs were preannealed at 37°C for 20 min. Coverslips were hybridized overnight with  
339 prepared probes at 37°C. After hybridization, coverslips were washed for 30 min twice in 2 $\times$   
340 SSC at 37°C, once in 1 $\times$  SSC at RT. Coverslips were blocked in 3% BSA (wt/vol) and  
341 digoxigenin was detected with sheep anti-digoxigenin FITC (Roche, 11207741910) followed by  
342 rabbit anti-sheep FITC (Vector Laboratories, FI-6000). Coverslips were stained with DAPI (0.5  
343  $\mu$ g/mL in PBS), washed with PBS and mounted in Slowfade® Diamond mountant for standard  
344 widefield imaging (Molecular Probes®) or in Vectashield for STED imaging (Vector  
345 Laboratories).

346 **Standard 3D DNA-FISH.** 3D DNA-FISH was performed as described previously<sup>36</sup>. In brief,  
347 cells were fixed in 4% PFA (vol/vol) for 15 min and permeabilized in 0.2% Triton X-100  
348 (vol/vol) for 10 min. Cells were denatured in 3.5 N HCl for 20 min and neutralized in ice-cold  
349 PBS. Probes were prepared as in the previous section, and coverslips were hybridized  
350 overnight at 37°C. Cells were washed and blocked, probes were detected and coverslips were  
351 mounted as in the previous section.

352 **Tolerance.** Pools of oligonucleotide probes were designed consisting of 30 nt tiling 6 kb of the  
353 MCSR2 region, avoiding large repeats, with 30 nt gaps between probes (80 oligonucleotides in  
354 total). The probes were synthesised with 5'-amino groups using standard phosphoramidite  
355 chemistry (ATDBio Ltd). After purification by gel filtration, the probes were labelled in pools  
356 covering 1 kb with either digoxigenin NHS ester or Cy3 NHS ester, to give a 6 kb probe with  
357 alternating 1 kb regions of Cy3 or digoxigenin. Conditions for labelling: 1 mM oligonucleotides,  
358 10 mM NHS ester (added as 0.1 M solution in DMSO), 0.5 M sodium carbonate buffer pH 8.5,  
359 shaken at 55 °C for 5 h and purified by gel filtration followed by RP-HPLC eluting with a 0.1 M  
360 TEAA/MeCN gradient. Fractions containing the products were combined, dried, desalted by  
361 gel filtration and lyophilised. MEL cells were fixed on coverslips and prepared according to the  
362 RASER-FISH protocol. The pooled probes were resuspended in water at 100 ng/  $\mu$ L. 1  $\mu$ L of  
363 the labelled oligonucleotide mixture was added to 5  $\mu$ L hybridisation buffer (Kreatech) and 5  
364  $\mu$ L 2X SSC. The probe mixture was denatured at 95°C for 5 min, placed on ice, then applied to  
365 the coverslip. The coverslips were hybridized at 37°C overnight, then washed, detected and  
366 mounted as previously described.

367 **Imaging Equipment and settings.** Widefield fluorescence imaging was performed at 20°C  
368 on a DeltaVision Elite system (Applied Precision) equipped with a 100 $\times$ /1.40 NA UPLSAPO oil  
369 immersion objective (Olympus), a CoolSnap HQ2 CCD camera (Photometrics), DAPI  
370 (excitation 390/18; emission 435/40), FITC (excitation 475/28; emission 525/45) and TRITC  
371 (excitation 542/27; emission 593/45) filters. 12-bit image stacks were acquired with a z-step of  
372 150 nm giving a voxel size of 64.5 nm x 64.5 nm x 150 nm. Image restoration was carried out  
373 using Huygens deconvolution Classic Maximum Likelihood Estimation (Scientific Volume

374 Imaging B.V.), STED images were acquired at 20°C on a Leica TCS SP8 3X Gated STED  
375 (Leica Microsystems), equipped with a pulsed supercontinuum white light excitation laser at  
376 80Mhz (NKT), and two continuous wavelength STED lasers at 592 nm and 660 nm. HyD  
377 detectors were used in gated mode (1.5-6ns for 592 depletion and 0.5-8.5ns for 660 depletion)  
378 A sequential imaging mode was set employing first the 660 nm STED laser, and then the 592  
379 nm STED laser to give a final voxel size of 31.9 nm x 31.9 nm x 110 nm in the image shown  
380 (Figure 3b), which was minimally smoothed by performing a Gaussian blur of 0.75 pixel radius  
381 in ImageJ (<https://imagej.net/>).

382 **Image Analysis.** Measurements of either distance or volume were made using in-house  
383 scripts (*Note; available via Github upon manuscript acceptance*) in ImageJ. As a pre-  
384 processing step image regions are chromatically corrected to align the green and the red  
385 channel images. The parameters for the chromatic correction were calculated through taking  
386 measurements from images of 0.1 µm TetraSpeck® (Molecular Probes®) and calculating the  
387 apparent offset between images in each colour channel. For both distance and volume  
388 measurement scripts, signals were manually selected by a single click whereupon a 20 x 20  
389 pixel and 7 x z-step sub-volume was generated centred on the identified location (Extended  
390 Data Fig. 9a). In each selected region, thresholding was applied to segment the foci. Firstly the  
391 image region was saturated beyond the top 96.5 % intensity level, to reduce the effect of noisy  
392 pixels, and then the threshold was calculated as being 90 % of the maximum intensity value of  
393 the processed image. This was repeated for both green and red channels and was found to  
394 accurately segment the foci from background. Once segmented the inter-centroid 3-D distance  
395 calculation was made between the centroids in 3-D and output along with a .png image for  
396 visual inspection (Extended Data Fig. 9a). For the volume analysis, the segmented volume for  
397 foci was integrated and converted into µm<sup>3</sup> units and output for each signal. We validated any  
398 increase in volume between MFL 0h and 30h by taking volume measurements of fluorescently  
399 labelled 500 nm diameter Tetraspeck® beads (Molecular Probes®) incorporated into the  
400 mountant where we found the bead volume measurements equivalent at the two time points  
401 (data not shown). Correlation of the positioning of paired FISH probes was assessed by

402 Pearson co-efficient of correlation analysis and was performed on the 20x20x7 raw intensity  
403 signals from each channel. Line profile analysis was performed using the Plot Profile function  
404 in Fiji<sup>37</sup>. We made initial comparisons between z-steps of 100 nm, 150 nm and 200 nm to  
405 assess any effect on inter-centroid 3-D distance measurements (Extended Data Fig. 9b) and  
406 established the tolerance of the inter-centroid distances produced by the analysis pipeline to  
407 be 53 nm (Extended Data Fig. 9c).

#### 408 **Statistics and reproducibility.**

409 Statistical analysis was carried out with Graphpad Prism (version 7.0c) unless otherwise  
410 indicated. Gene expression experiments were performed on three biological replicates  
411 (standard deviation (s.d.) is shown). All NG Capture-C experiments were performed on three  
412 biological replicates with the exception of WT and AMKO capture from R1/R2 which were each  
413 derived from one sample. The standard deviation of 250 bp bins was calculated in R and  
414 visualized to illustrate the reproducibility of this chromatin interaction analysis. All graphs  
415 showing FISH signal inter-distance data display median values with interquartile range with the  
416 exception of Extended Data Fig. 9c, which show mean values with s.d.. All volume analyses  
417 are displayed as cumulative frequency plots where the bins were in voxel sized increments.  
418 The statistical significance of differences in the range of distance measurements and volume  
419 measurements were derived as two-tailed by the Kruskal-Wallis test with Dunn's multiple  
420 comparisons. *P* values are represented as \**P* <0.05; \*\**P* <0.01; \*\*\**P* <0.001; \*\*\*\**P* <0.0001.

#### 421 **Data availability.**

422 Capture-C data generated for this study have been deposited in the Gene Expression  
423 Omnibus (GEO) under accession code (*in process of submission*). All images files are  
424 archived in OMERO and can be made available upon request. Analysis scripts for distance  
425 and volume measurements are available at [https://github.com/dwaithe/foci\\_measurements](https://github.com/dwaithe/foci_measurements)  
426 (*Note; this will be activated upon manuscript acceptance*). All other data supporting the  
427 findings of this study are available from the corresponding author on reasonable request.

428



429 **References**

- 430 1 Lieberman-Aiden, E. *et al.* Comprehensive mapping of long-range interactions  
431 reveals folding principles of the human genome. *Science* **326**,  
432 doi:10.1126/science.1181369 (2009).
- 433 2 Dixon, J. R. *et al.* Topological domains in mammalian genomes identified by  
434 analysis of chromatin interactions. *Nature* **485**, 376-380,  
435 doi:10.1038/nature11082 (2012).
- 436 3 Nora, E. P. *et al.* Spatial partitioning of the regulatory landscape of the X-  
437 inactivation centre. *Nature* **485**, 381-385, doi:10.1038/nature11049 (2012).
- 438 4 Tang, Z. H. *et al.* CTCF-Mediated Human 3D Genome Architecture Reveals  
439 Chromatin Topology for Transcription. *Cell* **163**, 1611-1627,  
440 doi:10.1016/j.cell.2015.11.024 (2015).
- 441 5 Rao, S. S. *et al.* A 3D map of the human genome at kilobase resolution reveals  
442 principles of chromatin looping. *Cell* **159**, doi:10.1016/j.cell.2014.11.021 (2014).
- 443 6 Phillips-Cremins, J. E. *et al.* Architectural protein subclasses shape 3D organization  
444 of genomes during lineage commitment. *Cell* **153**, 1281-1295,  
445 doi:10.1016/j.cell.2013.04.053 (2013).
- 446 7 Downen, J. M. *et al.* Control of cell identity genes occurs in insulated neighborhoods  
447 in mammalian chromosomes. *Cell* **159**, 374-387, doi:10.1016/j.cell.2014.09.030  
448 (2014).
- 449 8 Schmitt, A. D. *et al.* A Compendium of Chromatin Contact Maps Reveals Spatially  
450 Active Regions in the Human Genome. *Cell Rep* **17**, 2042-2059,  
451 doi:10.1016/j.celrep.2016.10.061 (2016).
- 452 9 Dixon, J. R. *et al.* Chromatin architecture reorganization during stem cell  
453 differentiation. *Nature* **518**, doi:10.1038/nature14222 (2015).
- 454 10 Davies, J. O. *et al.* Multiplexed analysis of chromosome conformation at vastly  
455 improved sensitivity. *Nat Methods* **13**, 74-80, doi:10.1038/nmeth.3664 (2016).
- 456 11 Hughes, J. R. *et al.* Analysis of hundreds of cis-regulatory landscapes at high  
457 resolution in a single, high-throughput experiment. *Nat Genet*,  
458 doi:10.1038/ng.2871 (2014).
- 459 12 Anguita, E. *et al.* Globin gene activation during haemopoiesis is driven by protein  
460 complexes nucleated by GATA-1 and GATA-2. *Embo Journal* **23**, 2841-2852,  
461 doi:10.1038/sj.emboj.7600274 (2004).
- 462 13 Hanssen, L. L. P. *et al.* Tissue-specific CTCF-cohesin-mediated chromatin  
463 architecture delimits enhancer interactions and function in vivo. *Nat Cell Biol* **19**,  
464 952-961, doi:10.1038/ncb3573 (2017).
- 465 14 Bonev, B. *et al.* Multiscale 3D Genome Rewiring during Mouse Neural  
466 Development. *Cell* **171**, 557-+, doi:10.1016/j.cell.2017.09.043 (2017).
- 467 15 Hansen, A. S., Pustova, I., Cattoglio, C., Tjian, R. & Darzacq, X. CTCF and cohesin  
468 regulate chromatin loop stability with distinct dynamics. *Elife* **6**, doi:ARTN e25776  
469 10.7554/eLife.25776 (2017).
- 470 16 Hell, S. W. Far-field optical nanoscopy. *Science* **316**, 1153-1158,  
471 doi:10.1126/science.1137395 (2007).
- 472 17 Bartman, C. R., Hsu, S. C., Hsiung, C. C., Raj, A. & Blobel, G. A. Enhancer Regulation of  
473 Transcriptional Bursting Parameters Revealed by Forced Chromatin Looping.  
474 *Molecular Cell* **62**, 237-247, doi:10.1016/j.molcel.2016.03.007 (2016).
- 475 18 Chen, T. & Dent, S. Y. Chromatin modifiers and remodellers: regulators of cellular  
476 differentiation. *Nature reviews. Genetics* **15**, 93-106, doi:10.1038/nrg3607 (2014).

- 477 19 Zabidi, M. A. *et al.* Enhancer-core-promoter specificity separates developmental  
478 and housekeeping gene regulation. *Nature* **518**, 556-559,  
479 doi:10.1038/nature13994 (2015).
- 480 20 Hay, D. *et al.* Genetic dissection of the alpha-globin super-enhancer in vivo. *Nat*  
481 *Genet* **48**, 895-903, doi:10.1038/ng.3605 (2016).
- 482 21 Benabdallah, N. S. *et al.* PARP mediated chromatin unfolding is coupled to long-  
483 range enhancer activation. *bioRxiv*, doi:10.1101/155325 (2017).
- 484 22 Hug, C. B., Grimaldi, A. G., Kruse, K. & Vaquerizas, J. M. Chromatin Architecture  
485 Emerges during Zygotic Genome Activation Independent of Transcription. *Cell*  
486 **169**, 216-228 e219, doi:10.1016/j.cell.2017.03.024 (2017).
- 487 23 Sanborn, A. L. *et al.* Chromatin extrusion explains key features of loop and domain  
488 formation in wild-type and engineered genomes. *PNAS* **112**,  
489 doi:10.1073/pnas.1518552112 (2015).
- 490 24 Fudenberg, G. *et al.* Formation of Chromosomal Domains by Loop Extrusion. *Cell*  
491 *Rep* **15**, 2038-2049, doi:10.1016/j.celrep.2016.04.085 (2016).
- 492 25 Barrington, C., Finn, R. & Hadjur, S. Cohesin biology meets the loop extrusion  
493 model. *Chromosome Res* **25**, 51-60, doi:10.1007/s10577-017-9550-3 (2017).
- 494 26 Cattoni, D. I. *et al.* Single-cell absolute contact probability detection reveals  
495 chromosomes are organized by multiple low-frequency yet specific interactions.  
496 *Nat Commun* **8**, 1753, doi:10.1038/s41467-017-01962-x (2017).
- 497 27 Chen, K. *et al.* Resolving the distinct stages in erythroid differentiation based on  
498 dynamic changes in membrane protein expression during erythropoiesis. *P Natl*  
499 *Acad Sci USA* **106**, 17413-17418, doi:10.1073/pnas.0909296106 (2009).
- 500 28 von Lindern, M. *et al.* Leukemic transformation of normal murine erythroid  
501 progenitors: v- and c-ErbB act through signaling pathways activated by the EpoR  
502 and c-Kit in stress erythropoiesis. *Oncogene* **20**, 3651-3664, doi:DOI  
503 10.1038/sj.onc.1204494 (2001).
- 504 29 Paszty, C. *et al.* Lethal alpha-thalassaemia created by gene targeting in mice and its  
505 genetic rescue. *Nat Genet* **11**, 33-39, doi:10.1038/ng0995-33 (1995).
- 506 30 Zhang, Y. M., Buchholz, F., Muyrers, J. P. P. & Stewart, A. F. A new logic for DNA  
507 engineering using recombination in *Escherichia coli*. *Nature Genetics* **20**, 123-128,  
508 doi:Doi 10.1038/2417 (1998).
- 509 31 Abe, K. *et al.* Contribution of Asian mouse subspecies *Mus musculus molossinus* to  
510 genomic constitution of strain C57BL/6J, as defined by BAC-end sequence-SKIP  
511 analysis. *Genome Research* **14**, 2439-2447, doi:10.1101/gr.2899304 (2004).
- 512 32 Brown, J. *et al.* Subtelomeric chromosome rearrangements are detected using an  
513 innovative 12-color FISH assay (M-TEL). *Nat Med* **7**, 497-501, doi:Doi  
514 10.1038/86581 (2001).
- 515 33 Markaki, Y. *et al.* The potential of 3D-FISH and super-resolution structured  
516 illumination microscopy for studies of 3D nuclear architecture: 3D structured  
517 illumination microscopy of defined chromosomal structures visualized by 3D  
518 (immuno)-FISH opens new perspectives for studies of nuclear architecture.  
519 *Bioessays* **34**, 412-426, doi:10.1002/bies.201100176 (2012).
- 520 34 Solovei, I. *et al.* Spatial preservation of nuclear chromatin architecture during  
521 three-dimensional fluorescence in situ hybridization (3D-FISH). *Exp Cell Res* **276**,  
522 10-23, doi:10.1006/excr.2002.5513 (2002).
- 523 35 Bailey, S. M., Goodwin, E. H. & Cornforth, M. N. Strand-specific fluorescence in situ  
524 hybridization: the CO-FISH family. *Cytogenet Genome Res* **107**, 14-17,  
525 doi:10.1159/000079565 (2004).

- 526 36 Brown, J. M. *et al.* Coregulated human globin genes are frequently in spatial  
527 proximity when active. *The Journal of cell biology* **172**, 177-187,  
528 doi:10.1083/jcb.200507073 (2006).  
529 37 Schindelin, J. *et al.* Fiji: an open-source platform for biological-image analysis.  
530 *Nature Methods* **9**, 676-682, doi:10.1038/Nmeth.2019 (2012).

531  
532

533 **Acknowledgements** We thank S. Butler for tissue culture support, J. Sloane-Stanley and J.  
534 Sharp for mouse breeding and foetal liver provision, K. Clark and C. Waugh of the Flow  
535 Cytometry Facility for FACS analysis, E. Repapi for advice on statistical analysis, E. Garcia for  
536 advice on STED imaging, C. Harrold and J. Davies for analysis of NG Capture-C data, T.  
537 Brown for oligonucleotide synthesis support. This work was supported by the Medical  
538 Research Council (MC\_UU\_12009 to V.J.B., D.H., J.H. and MR/N00969X/1 to J.H.) and  
539 Wellcome Trust (106130/Z/14/Z to DH). Further support came from grants to the Wolfson  
540 Imaging Centre Oxford (Wolfson Foundation 18272, joint MRC/BBSRC/EPSC  
541 MR/K015777X/1, Wellcome Trust Multi-User Equipment 104924/Z/14/Z) and the WIMM FACS  
542 Core Facility (NIHR Oxford BRC and John Fell Fund (131/030 and 101/517), the EPA fund  
543 (CF182 and CF170) and by the WIMM Strategic Alliance awards G0902418 and  
544 MC\_UU\_12025).

545

#### 546 **Author Affiliations**

547 MRC Molecular Haematology Unit, MRC Weatherall Institute of Molecular Medicine, Oxford  
548 OX3 9DS, UK

549 Jill M. Brown, Bryony Graham, Nigel Roberts, Sara De Ornellas, Jelena Telenius, Izabela  
550 Szczerbal<sup>&</sup>, A. Marieke Oudelaar, Christian Babbs, Mira T. Kassouf, Jim R. Hughes, Douglas  
551 R. Higgs & Veronica J. Buckle\*

552 Wolfson Imaging Facility, MRC Weatherall Institute of Molecular Medicine, Oxford OX3 9DS,  
553 UK

554 Christoffer Lagerholm & Dominic Waithe

555 <sup>&</sup> Current Address: Department of Genetics and Animal Breeding, Poznan University of Life  
556 Sciences, Poznan, Poland.

557

558 **Author Contributions** V.J.B. and D.R.H. conceived the project. J.M.B. and V.J.B. developed  
559 the RASER-FISH technique from Co-FISH and performed the FISH experiments with  
560 assistance from I.S. C.B. sub-cloned the FISH probes and S.D.O. synthesised  
561 oligonucleotides. C.L. assisted with the imaging and image storage. D.W. wrote scripts for and  
562 advised on image analysis. A.M.O. designed analysis of the  $\alpha$ -globin domain by NG Capture-

563 C. N.R. and J.T. undertook the NG Capture-C experiments and subsequent analysis  
564 respectively. B.G. and M.T.K. developed the erythroblast *ex vivo* differentiation system and  
565 B.G. performed the FACS analysis and nascent transcript quantification. V.J.B., J.M.B., J.R.H.  
566 and D.R.H. wrote the paper.

567

568 **Author Information** The authors declare no competing financial interests. Correspondence  
569 and requests for materials should be addressed to V.J.B. ([veronica.buckle@imm.ox.ac.uk](mailto:veronica.buckle@imm.ox.ac.uk)).

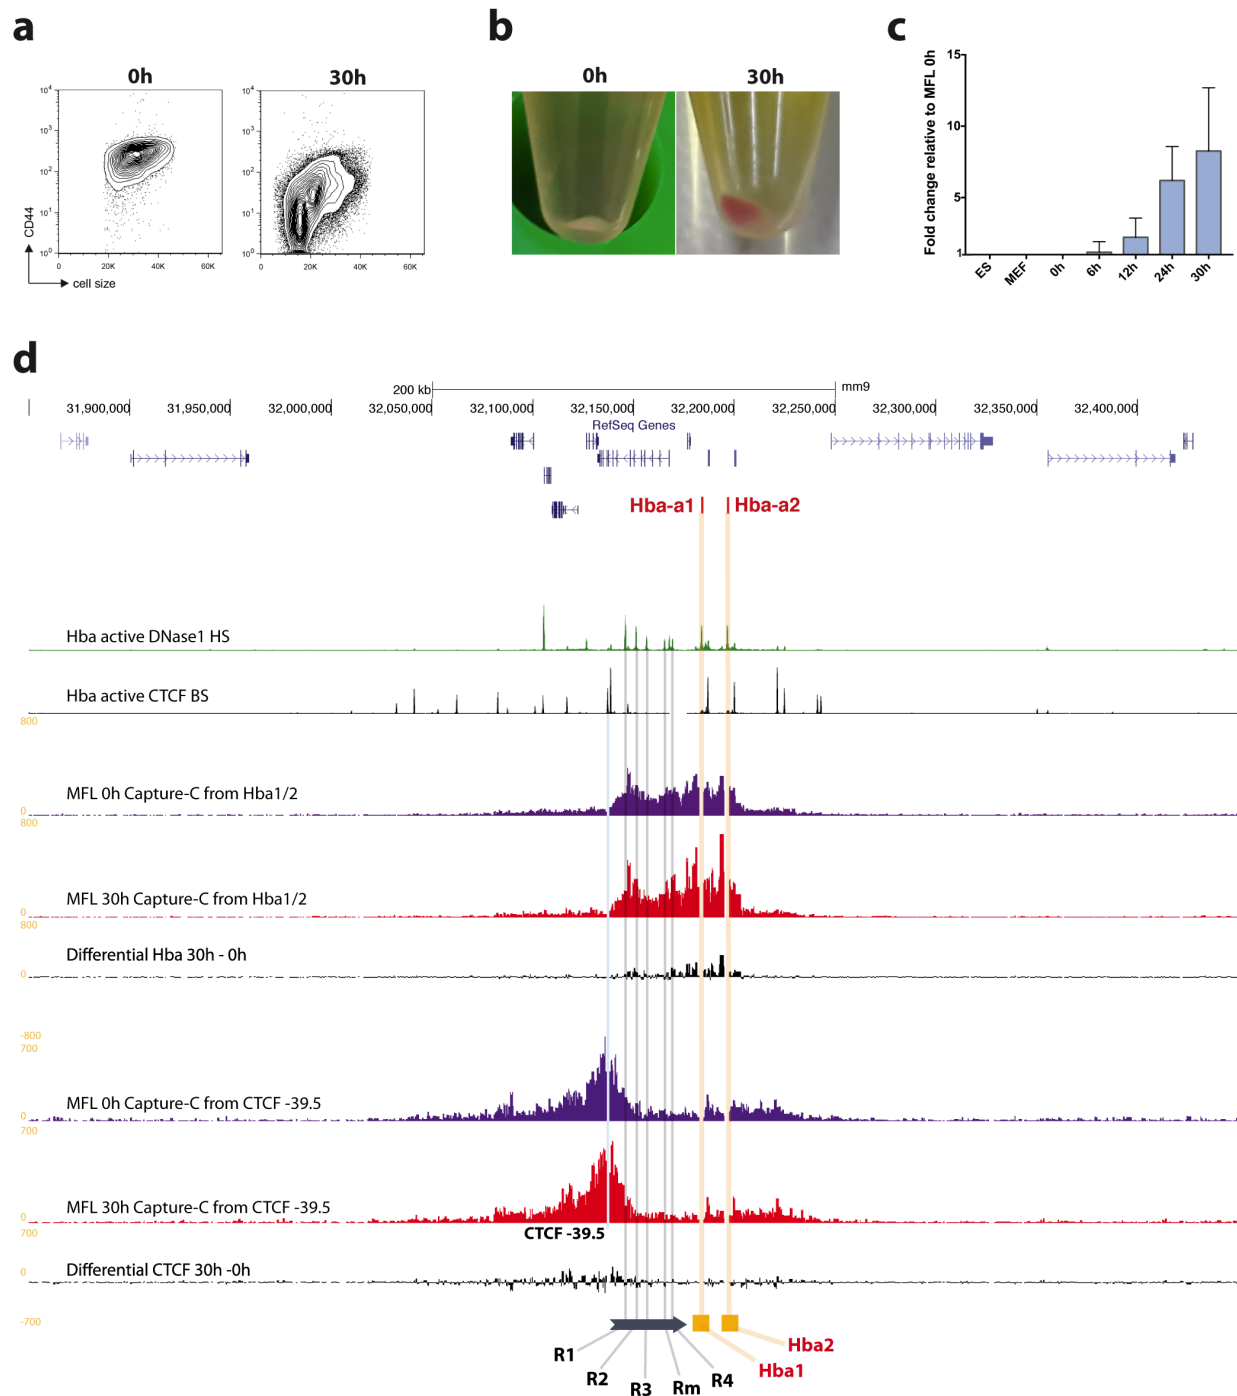

570  
571  
572 **Figure 1: A self-interacting domain at the  $\alpha$ -globin locus is formed in both MFL 0h and 30h**  
573 **erythroblasts.** **a**, Representative FACS plots of MFL erythroblasts defined by CD44 and cell size, at  
574 0h and after a further 30h differentiation *in vitro*, identifying distinct populations at the two timepoints.  
575 **b**, Cell pellets from MFL 0h and 30h culture showing differentiated haemoglobinised erythroblasts  
576 present only at 30h. **c**, Nascent Hba transcription relative to 18S in the cell types and MFL timepoints  
577 indicated. n=3. Error bar is standard deviation. **d**, Map of the gene dense murine  $\alpha$ -globin locus with  
578 Hba genes highlighted in red and gene browser tracks showing DNase1 hypersensitive sites (green)  
579 and CTCF binding sites (BS black)<sup>11</sup>. Next, NG Capture-C tracks using Hba1/2 as viewpoints in MFL

580 erythroblasts at 0h and 30h with a differential track showing minimal changes between the two  
581 timepoints. Three further tracks in the same arrangement use the CTCF BS -39.5 as viewpoint. The  
582 location of the Hba genes, the five murine enhancer elements and the CTCF BS -39.5 are marked  
583 against the browser tracks in yellow, grey and blue vertical bars respectively.

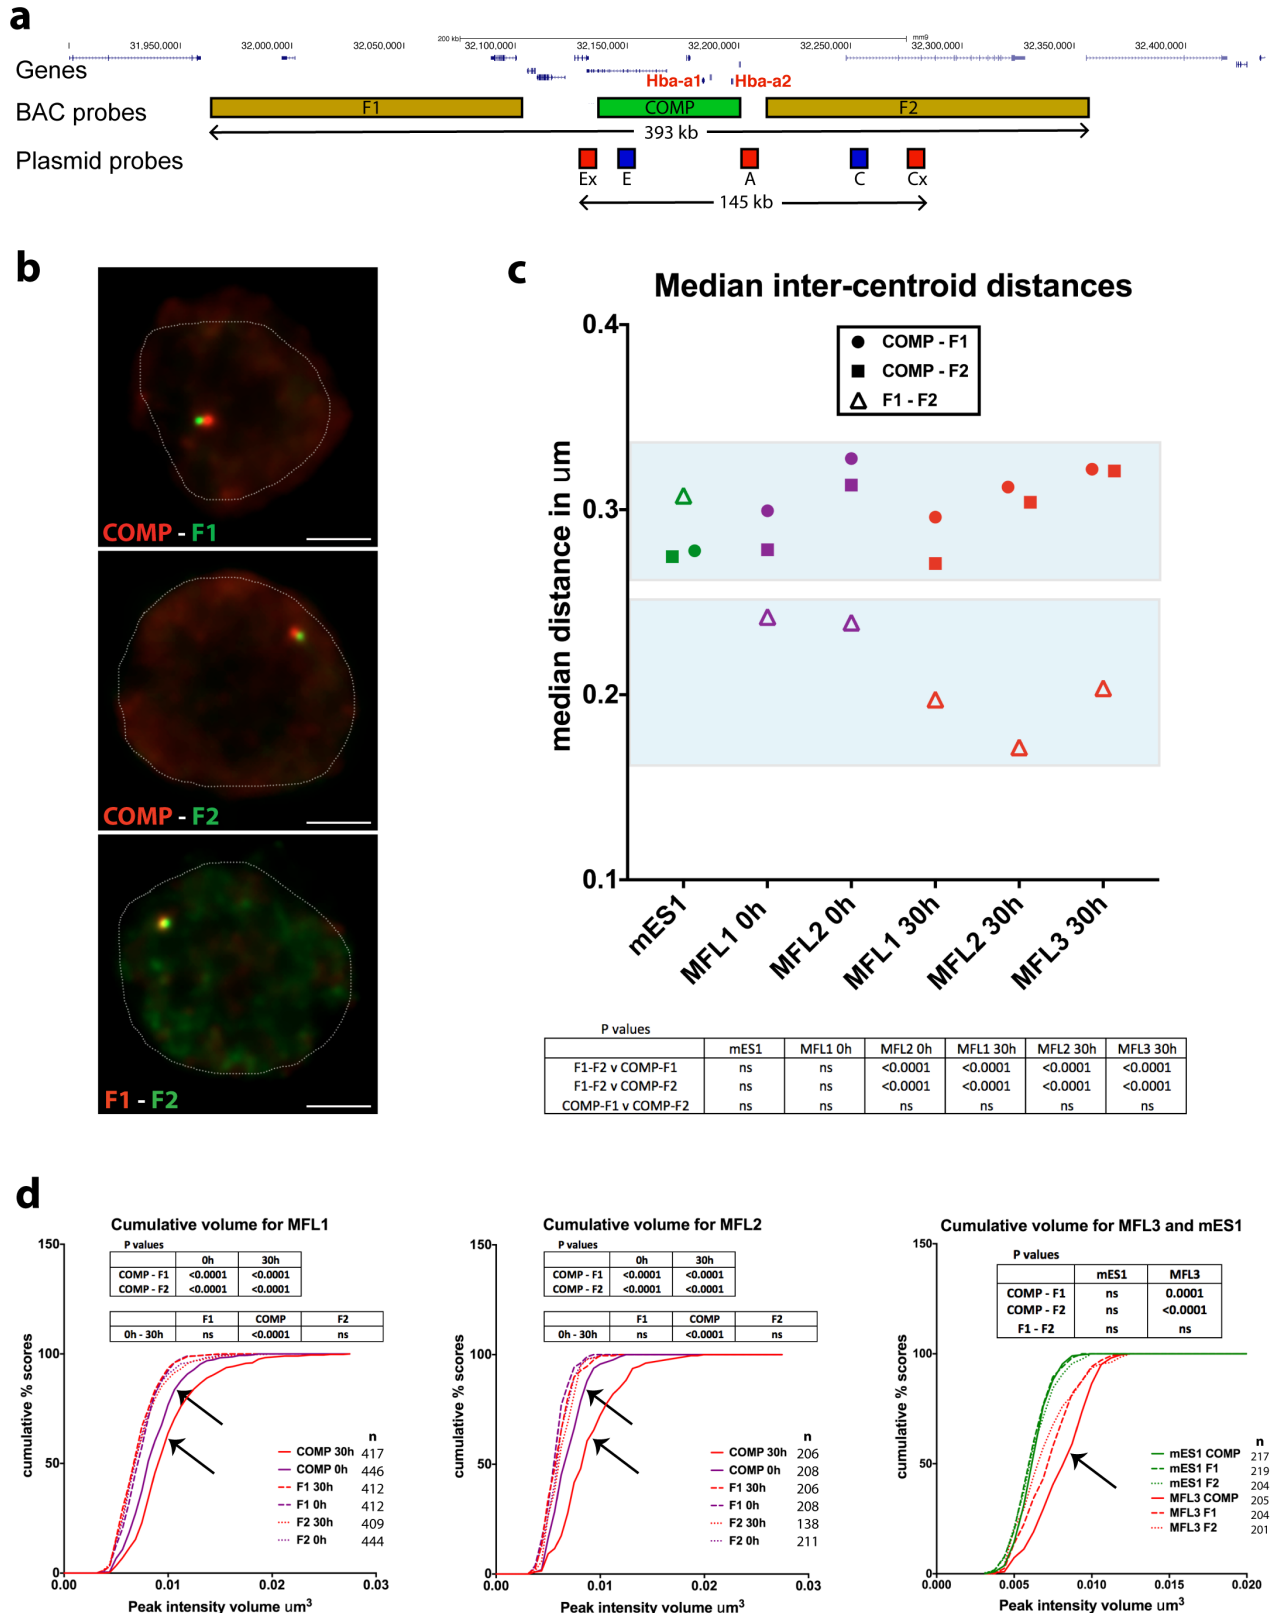

584

585

586 **Figure 2: Volume and proximity measurements across the  $\alpha$ -globin locus in WT mice.** a, Gene  
587 map and locations of the BAC and plasmid FISH probes to scale, with total genomic distance  
588 encompassed. b, Representative images for the three BAC probe pairs in MFL 30h erythroblasts

589 with nuclei delineated. Scale bar 2  $\mu\text{m}$ . **c**, Median inter-centroid distances between the three probe  
590 pairs indicated, in mES cells (green) and erythroblasts at 0h (purple) and 30h (red) timepoints.  
591 MFL1, 2 and 3 represent cultures from three individual foetal livers. Light blue boxes emphasise  
592 proximity of the flanking regions F1-F2 in erythroblasts.  $n = 87\text{-}236$  - see Extended Data Fig. 2 for  
593 the complete data set. **d**, Cumulative frequency plots of BAC signal volumes in mES cells (green)  
594 and erythroblasts at 0h (purple) and 30h (red). COMP values indicating expanded volume are  
595 arrowed. All P values are derived by a Kruskal-Wallis test with Dunn's multiple comparisons. ns = not  
596 significant.



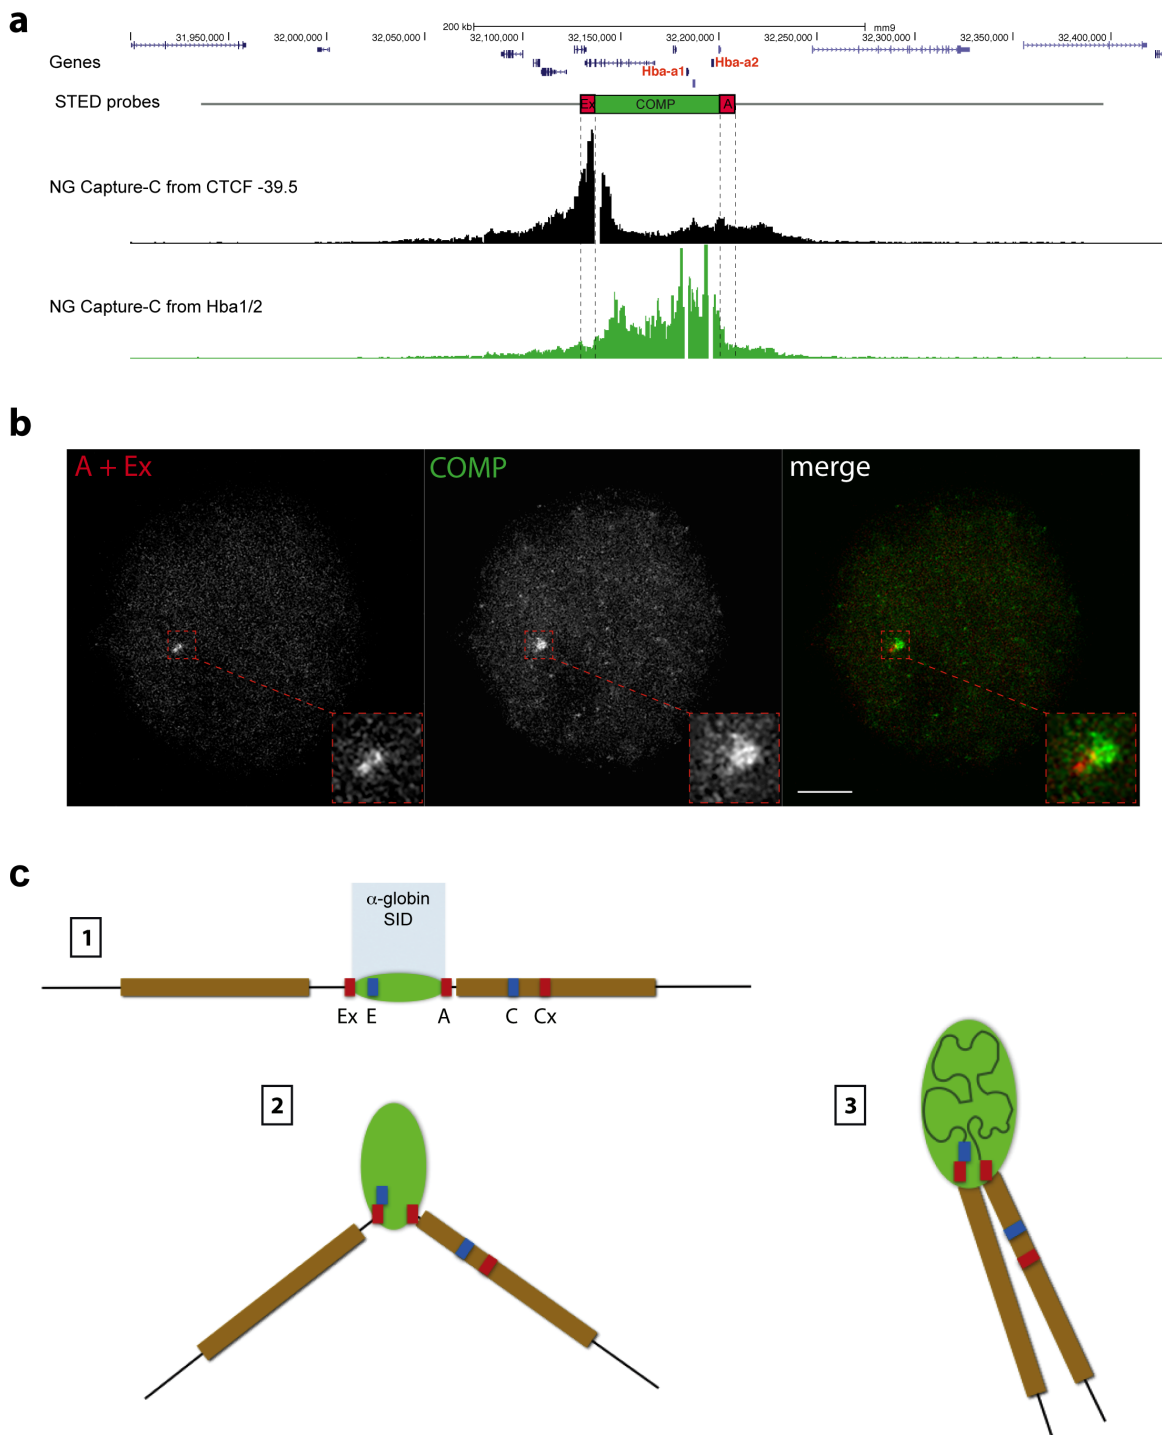

597  
 598 **Figure 3: Super-resolution imaging of the  $\alpha$ -globin domain informs a schematic model of the**  
 599 **locus.** **a**, Gene map with FISH probe locations marked against NG Capture-C tracks depicting  
 600 interactions at MFL 30h from the viewpoints CTCF BS -39.5 (black) and HBA1/2 promoters (green).  
 601 **b**, 2D STED maximum intensity images of FISH probes A and Ex (both red) which flank the  $\alpha$ -globin  
 602 domain, the COMP BAC (green) defining the extent of the domain and a merged image showing a  
 603 cloud of domain signal distinct from the paired probes A and Ex. Bar = 2  $\mu$ m. **c**, Model showing the  
 604 development of the  $\alpha$ -globin self-interacting domain (SID) (green). Sites detected by FISH probes

605 are as for Fig. 2. Stage 1 represents the linear locus, whilst Stage 2 and 3 depict the development of  
606 the self-interacting domain, where the domain expands as chromatin decompacts and the flanking  
607 regions can sit in proximity.

608

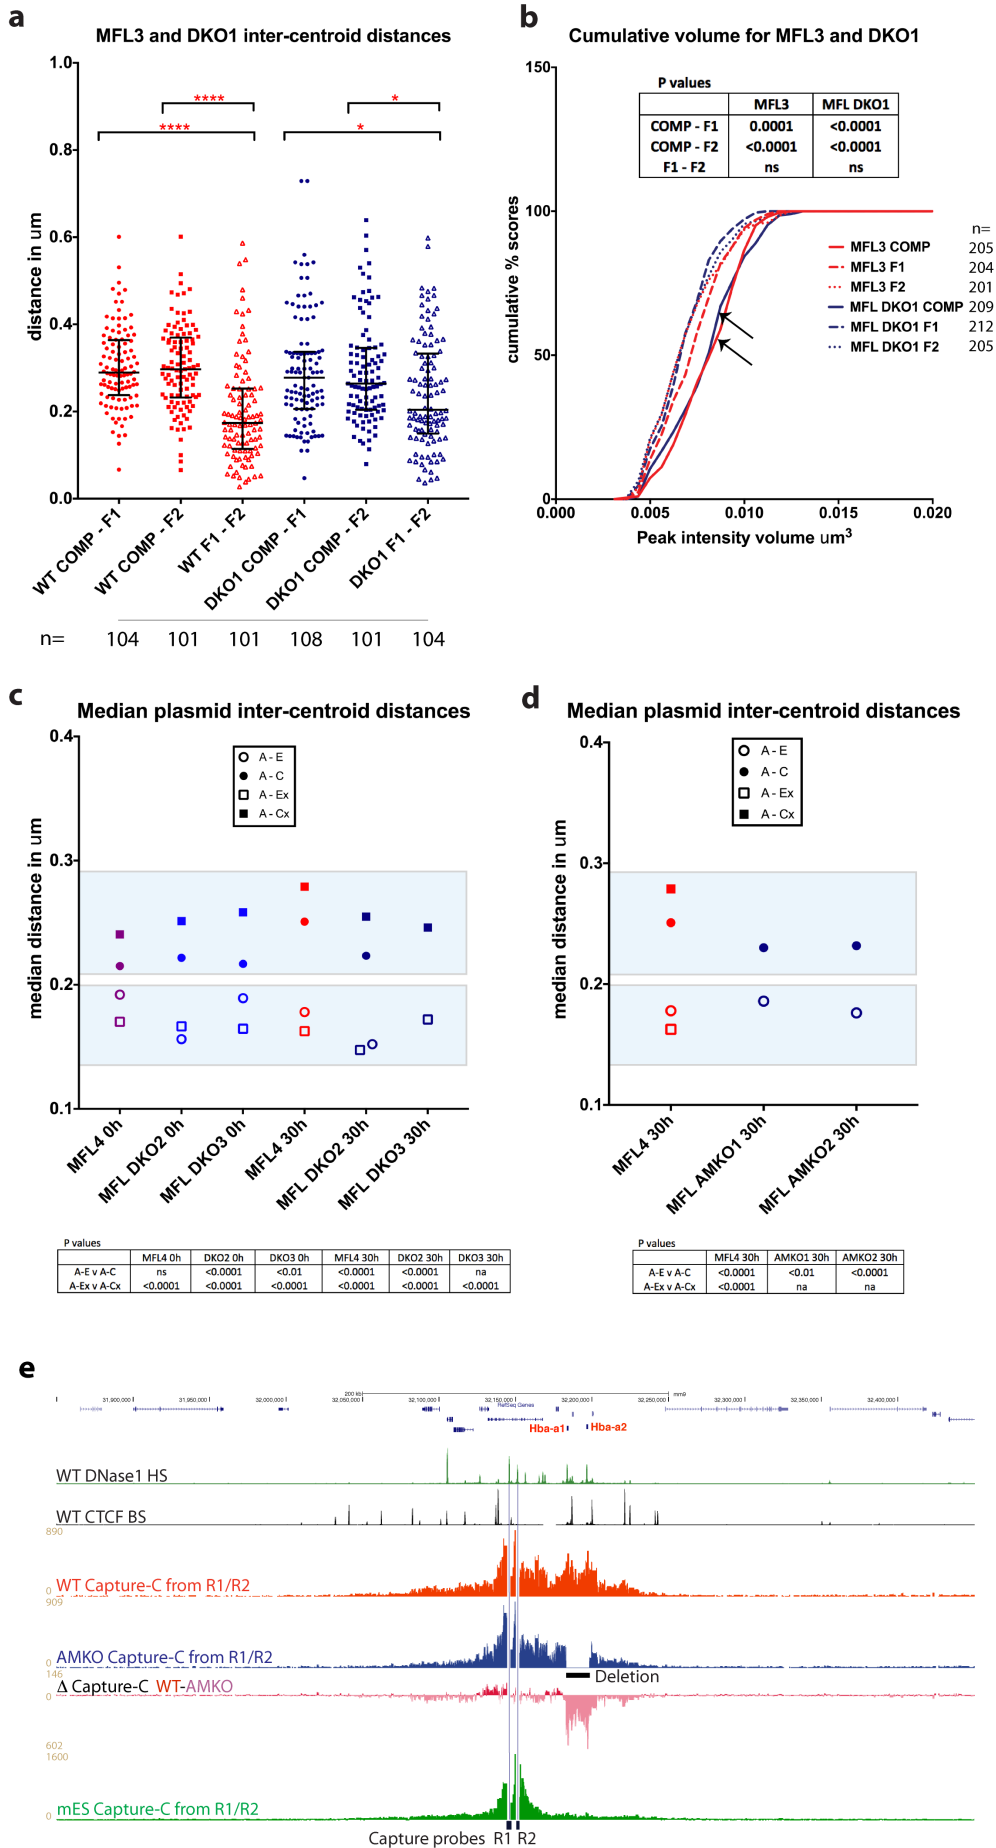

610 **Figure 4: The  $\alpha$ -globin domain still forms in the absence of critical elements.** **a**, Pairwise inter-  
611 centroid distances between three BAC probes in 30h erythroblasts derived from littermates MFL3  
612 (WT) and DKO1 (homozygous deletions for MCSR1/R2). F1-F2 are significantly more frequently  
613 closer than COMP-F1 and COMP-F2 in both WT ( $p < 0.0001$  for both) and DKO1 derived  
614 erythroblasts ( $p = 0.0374$  and  $0.0468$  respectively). **b**, Cumulative frequency plots of BAC signal  
615 volumes in 30h erythroblasts from MFL3 and DKO1. COMP values are arrowed. **c**, Median inter-  
616 centroid distances between four plasmid probe pairs at MFL 0h and 30h from littermates WT MFL4  
617 and two homozygous double knockout embryos DKO2 and DKO3. Light blue boxes emphasise the  
618 shorter distances within the self-interacting domain in both WT and knockouts. See Extended Data  
619 Fig. 6 for the complete data set. **d**, Median inter-centroid distances between plasmid probe pairs A-  
620 Ex (represented as A-E distance because of a 16 kb  $\alpha$ -globin gene deletion) and A-C at MFL 30h in  
621 two  $\alpha$ -globin knockout lines from littermates AMKO1 and AMKO2, plotted against WT MFL4. Light  
622 blue boxes are as for **c**. See Extended Data Fig. 6 for full data. **e**, Gene map followed by DNase1  
623 hypersensitive sites (green) and CTCF BS (black) genome browser tracks, then NG Capture-C  
624 tracks highlighting interactions from MCS-R1/-R2 viewpoints in MFL WT (red) and MFL AMKO  
625 (blue), with a differential track WT-AMKO showing persistence of domain structure in AMKO when  
626 contrasted with the absence of a domain observed in mES cells (green). All P values are derived by  
627 a Kruskal-Wallis test with Dunn's multiple comparisons. ns = not significant.

628

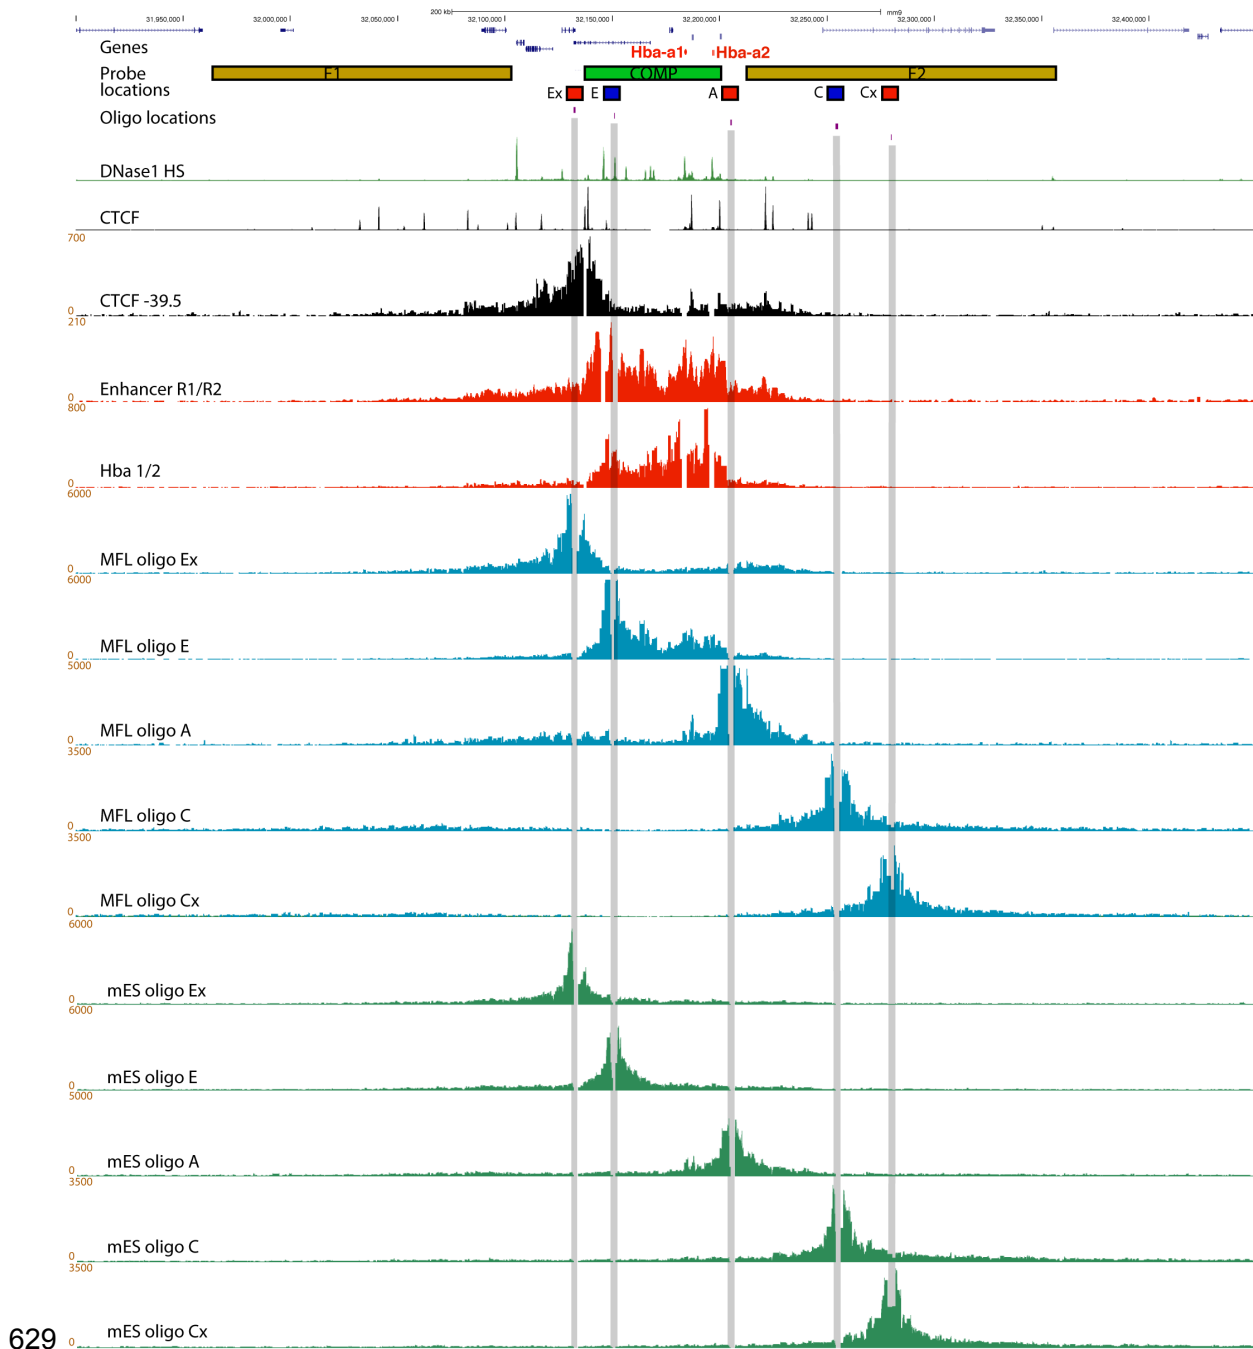

629  
630  
631 **Extended Data Figure 1: Chromatin interactions detected from FISH probe viewpoints in**  
632 **erythroblasts and mES cells.** Hba genes are highlighted in red, followed by the locations of the  
633 BAC (F1, COMP, F2) and plasmid (Ex, E, A, C, Cx) FISH probes and the 50mer oligonucleotides  
634 used for capture. Underneath are genome browser tracks showing DNase1 hypersensitive sites  
635 (green) and CTCF BS (black), then NG Capture-C tracks for MFL 30h using the CTCF -39.5 BS  
636 (black), the two major enhancer elements MCS-R1/-R2, and the Hba genes as viewpoints (both  
637 red). Below are five NG Capture-C tracks from MFL 30h erythroblasts (blue) depicting interactions  
638 from the viewpoints of the five FISH probes, as indicated. Interactions detected by oligo Ex mirror  
639 those detected from the CTCF BS -39.5 at the upstream side of the  $\alpha$ -globin domain; oligo E detects

640 interactions within the self-interacting domain, matching the Enhancer R1/R2 track; oligo A detects  
641 interactions at the opposite side of the domain whilst control oligos C and Cx principally detect  
642 proximity interactions. Measurements A to E will therefore reflect a mixture of interactions within and  
643 across the domain. Five further tracks (green) depict interactions in E14 mES cells where only  
644 proximity interactions are detected.

645

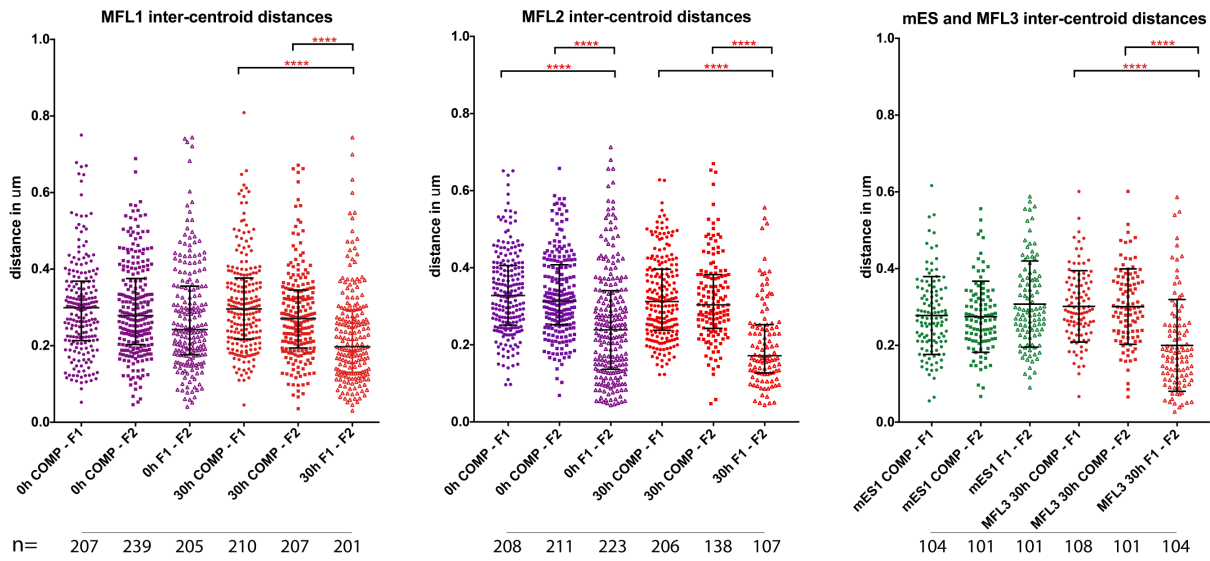

646 n= 207 239 205 210 207 201

647

648 **Extended Data Figure 2: Proximity measurements across a 320 kb region encompassing the**  
649  **$\alpha$ -globin locus in mouse WT cells.** Inter-centroid distance measurements between three BAC  
650 probe pairs, COMP-F1 (circles), COMP-F2 (squares) and F1-F2 (open triangles) in erythroblasts  
651 derived from three independent MFL cultures and in mES cells. MFL1 and MFL2 measurements are  
652 given for two time points, 0h and 30h. Each dot represents a single measurement. Error bars  
653 indicate median value and interquartile range. Statistical significance of differences in range of  
654 measurements, derived by a Kruskal-Wallis test with Dunn's multiple comparisons, is shown  
655 (\*\*\*\* $p < 0.0001$ ).

656

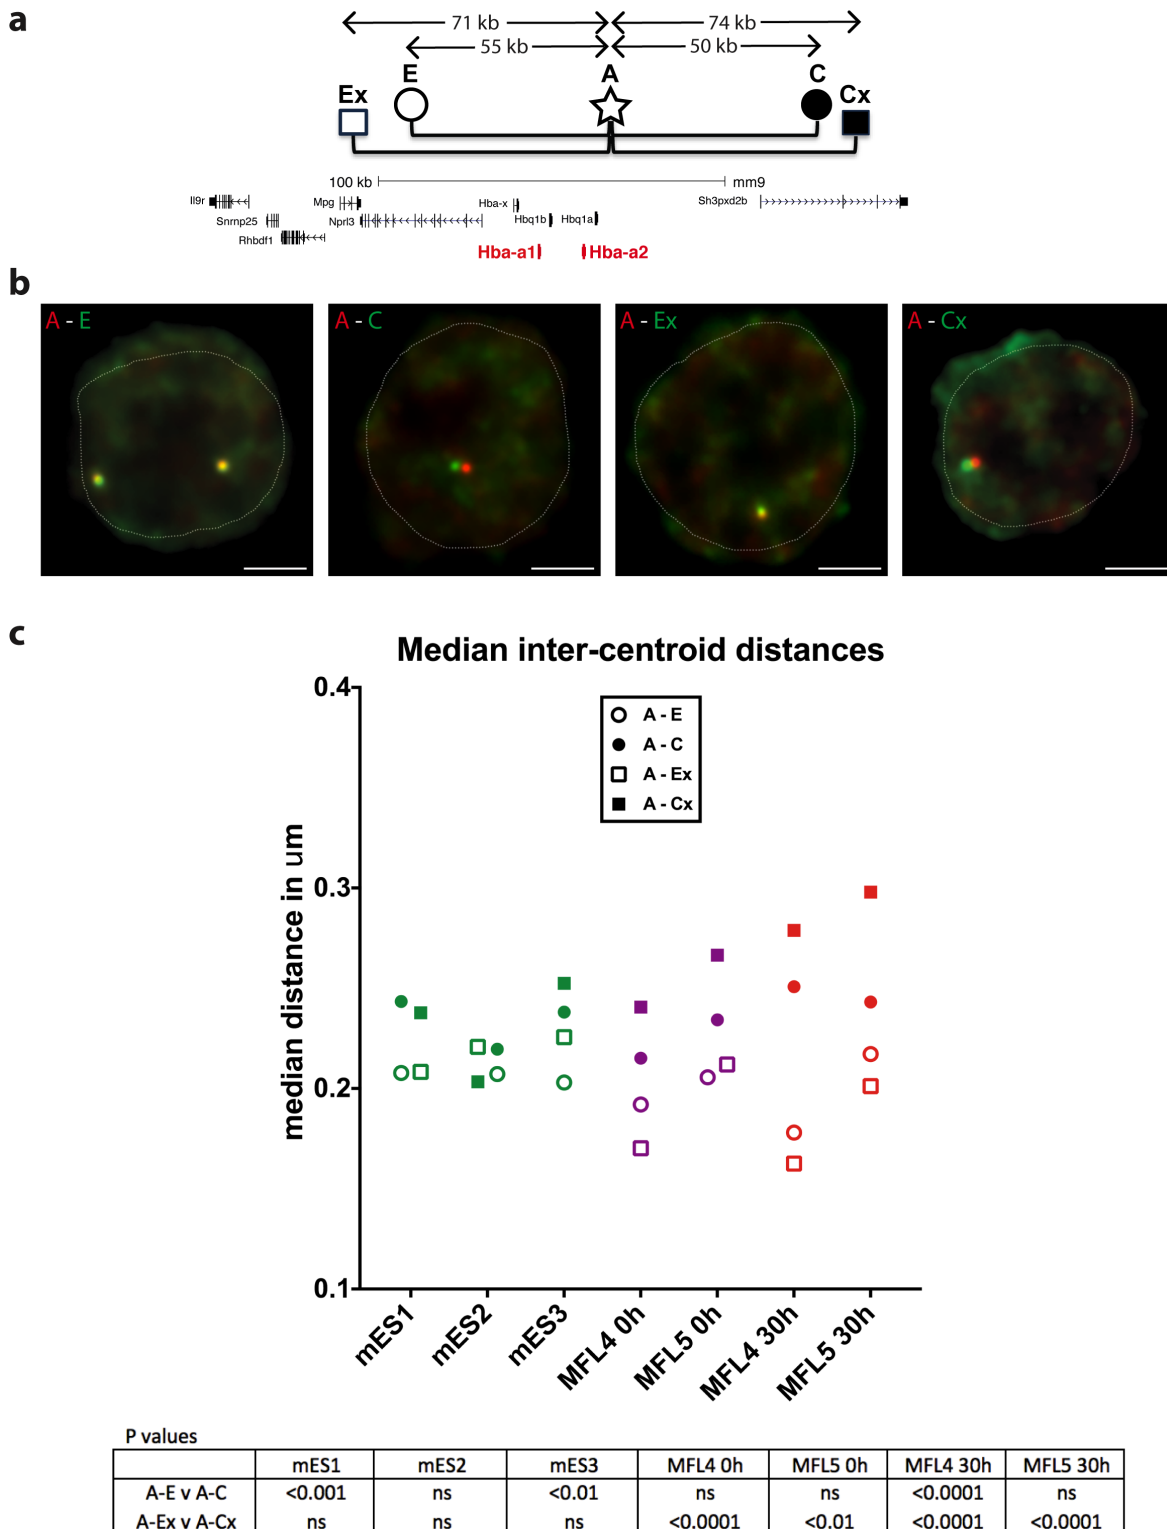

657  
658  
659 **Extended Data Figure 3: Proximity measurements at the  $\alpha$ -globin locus in mouse WT cells.** **a**,  
660 Gene map with plasmid FISH probe locations showing the pairwise combinations used to measure  
661 inter-probe distances. Using probe A as a point of reference, measurements were made to the  
662 domain side (E, Ex) of probe A compared to the control non-interacting side (C, Cx). Genomic  
663 distances between midpoints of the probe pairs are shown. **b**, Representative images of RASER-



664 FISH hybridisation signals for the four plasmid probe pairs in MFL 30h erythroblasts. White dotted  
665 line delineates nuclei. Scale bar 2 $\mu$ m. **c**, Median inter-centroid distances measured between the four  
666 probe pairs in three different cell types, mES1-3 (green), MFL4-5 0h (purple) and MFL4-5 30h (red).  
667 P values, derived by a Kruskal-Wallis test with Dunn's multiple comparisons, are shown. See  
668 Extended Data Fig. 4 for full data with statistical analyses. At MFL 30h but not mES, the distance  
669 between A and Ex is consistently statistically shorter ( $p < 0.0001$ ) than A to Cx.

670

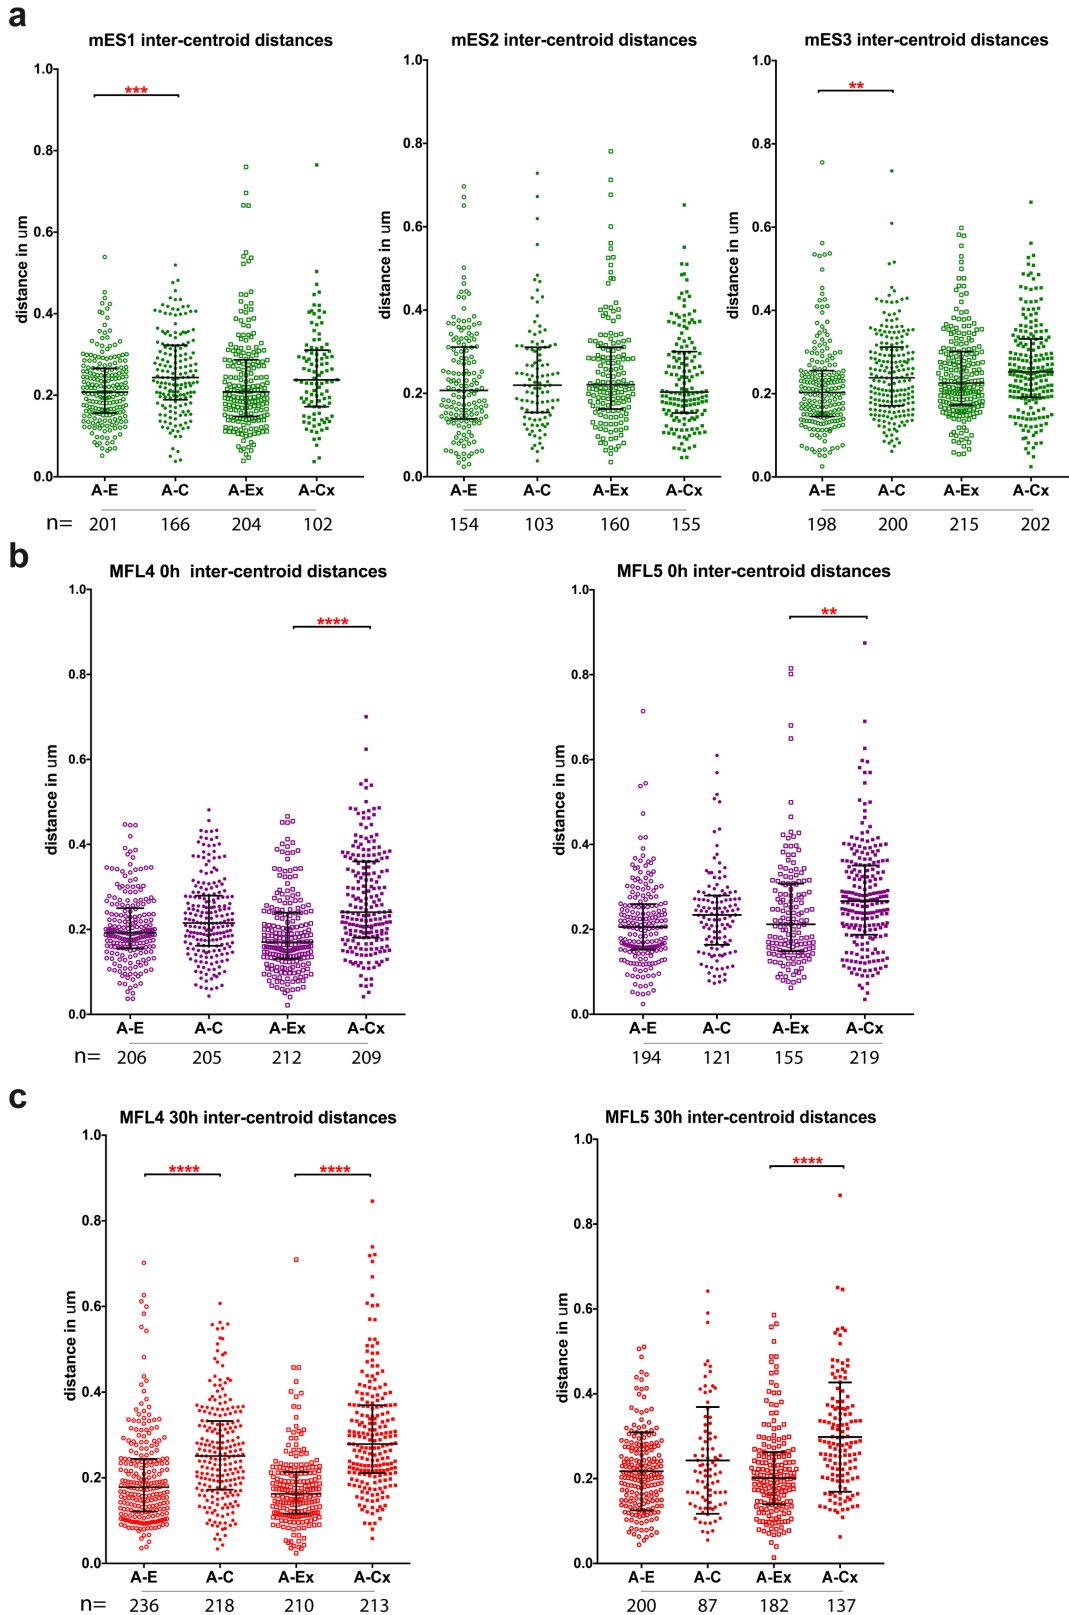

671  
672  
673 **Extended Data Figure 4: Proximity measurements at the  $\alpha$ -globin locus between plasmid**  
674 **probe pairs.** a, Inter-centroid distances measured between the four probe pairs A-E (open circles),  
675 A-C (closed circles), A-Ex (open squares), A-Cx (closed squares) in three mES cell cultures (green).  
676 Each dot represents a single measurement. Error bars indicate median value and interquartile range.

677 Statistical significance of differences in range of measurements, derived by a Kruskal-Wallis test with  
678 Dunn's multiple comparisons, is shown. **b**, Inter-centroid distances plotted as above for two MFL  
679 cultures harvested at 0h (purple). **c**, Inter-centroid distances plotted as above for two MFL cultures  
680 harvested at 30h (red). \*\*\*\* $p < 0.0001$ ; \*\*\* $p < 0.001$ ; \*\* $p < 0.01$ .

681

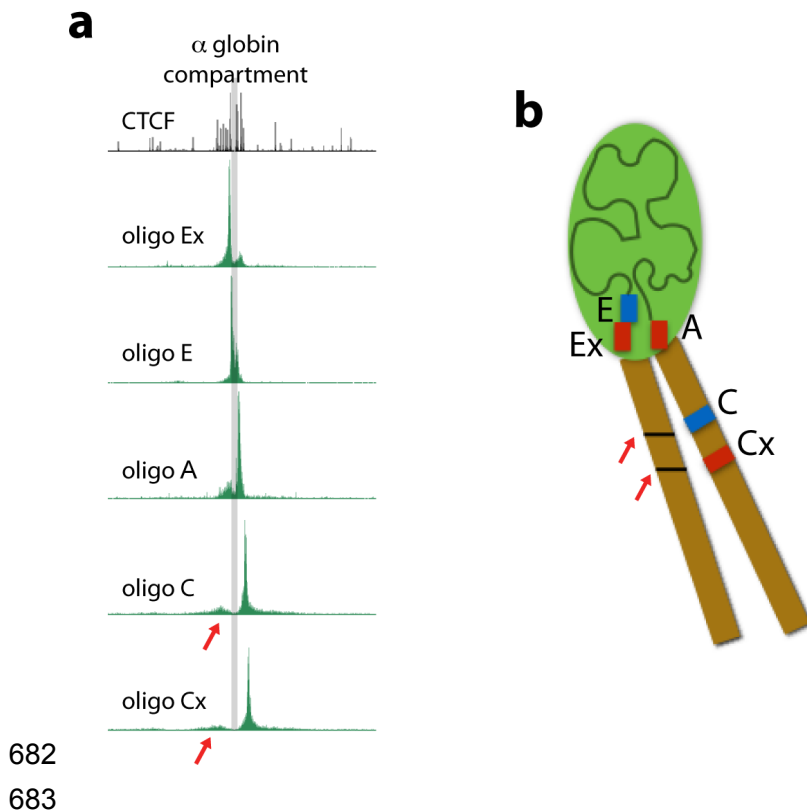

684 **Extended Data Figure 5: Infrequent interactions occur between chromatin regions**  
685 **encompassing the  $\alpha$ -globin self-interacting domain.** **a**, A larger scale view of NG Capture-C  
686 tracks for MFL30h from plasmid probe viewpoints as presented in Extended Data Fig. 1. The extent  
687 of the  $\alpha$ -globin domain is defined by the pale grey bar. Outlying interactions detected by oligo C and  
688 Cx to a region devoid of genes or erythroid-specific accessibility are indicated by red arrows. Careful  
689 examination indicates that C interacts rather more frequently and with a region that is slightly closer  
690 than Cx. Such interactions are consistent with the development of a distinct domain that affects the  
691 positioning of the flanking regions. **b**, Model of the domain showing that the structure created by the  
692 self-interacting domain can lead to more frequent interactions between surrounding chromatin.  
693

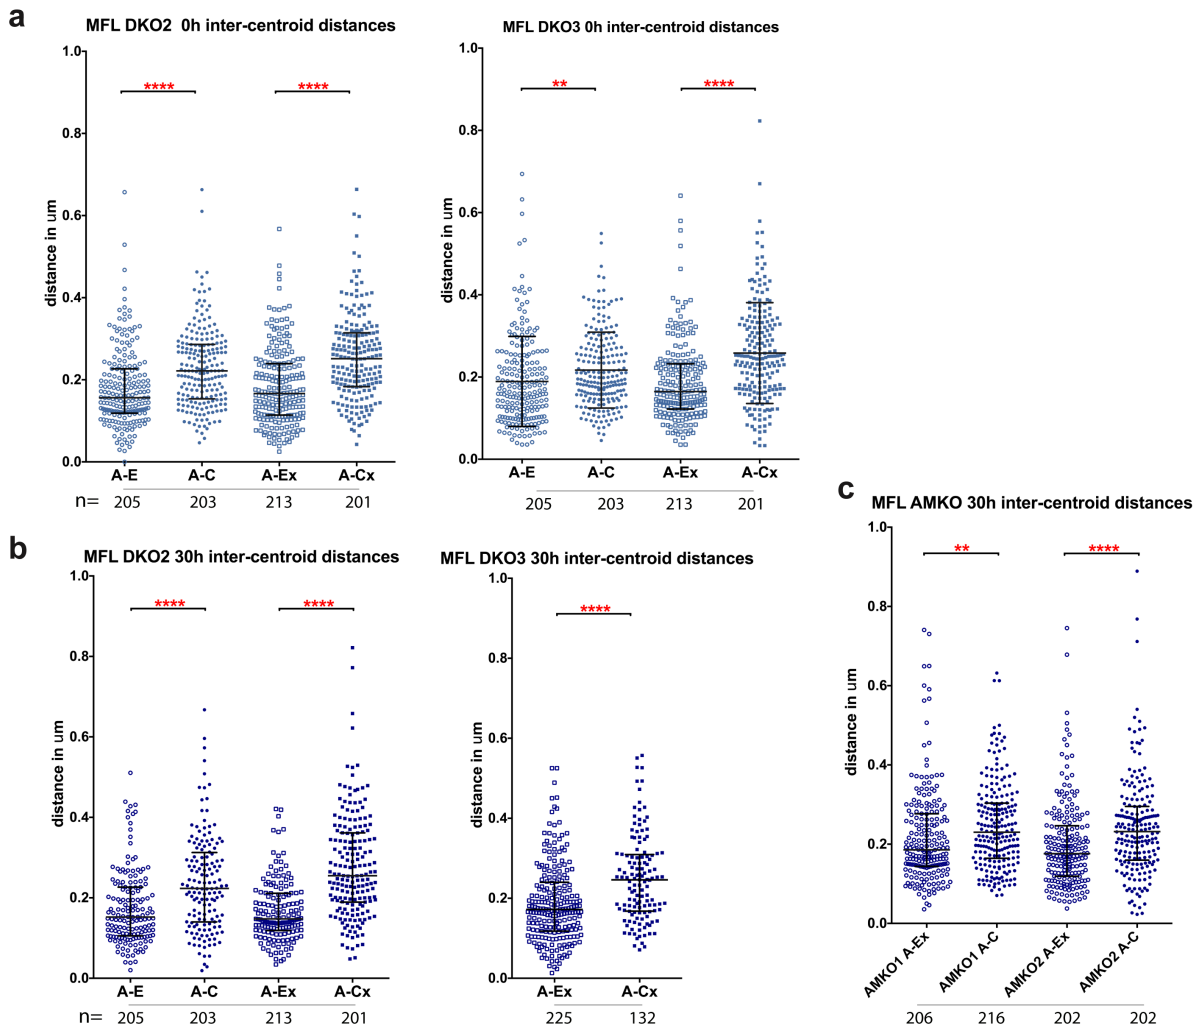

694

695

696 **Extended Data Figure 6: Proximity measurements at the  $\alpha$ -globin locus between plasmid**  
 697 **probe pairs in knockout mouse lines.** **a**, Inter-centroid distances measured between the four  
 698 probe pairs A-E (open circles), A-C (closed circles), A-Ex (open squares), A-Cx (closed squares) in  
 699 two MFL DKO erythroblast cultures at 0h (light blue). Each dot represents a single measurement.  
 700 Error bars indicate median value and interquartile range. Statistical significance of differences in  
 701 range of measurements, derived by a Kruskal-Wallis test with Dunn's multiple comparisons, is  
 702 shown. **b**, Inter-centroid distances plotted as above for two MFL DKO cultures harvested at 30h  
 703 (dark blue). **c**, Inter-centroid distances plotted as above for two MFL AMKO cultures harvested at  
 704 30h (dark blue). \*\*\*\* $p < 0.0001$ ; \*\*\* $p < 0.001$ ; \*\* $p < 0.01$ .

705

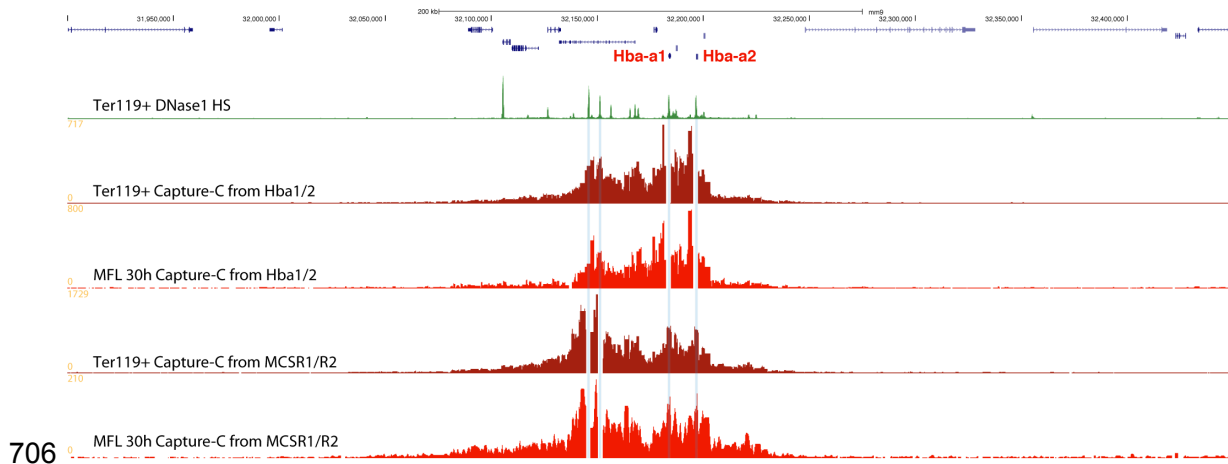

706  
707  
708 **Extended Data Figure 7: Erythroblasts derived from adult spleen or foetal liver form the same**  
709 **domain of chromatin interactions at the  $\alpha$ -globin locus.** Layout as for Fig. 1c. Capture-C tracks  
710 from Hba1/2 and MCSR1/R2 viewpoints show the same pattern of chromatin interactions between  
711 erythroblasts derived from adult spleen (Ter119+ dark red) and foetal liver (MFL 30h red).  
712

713

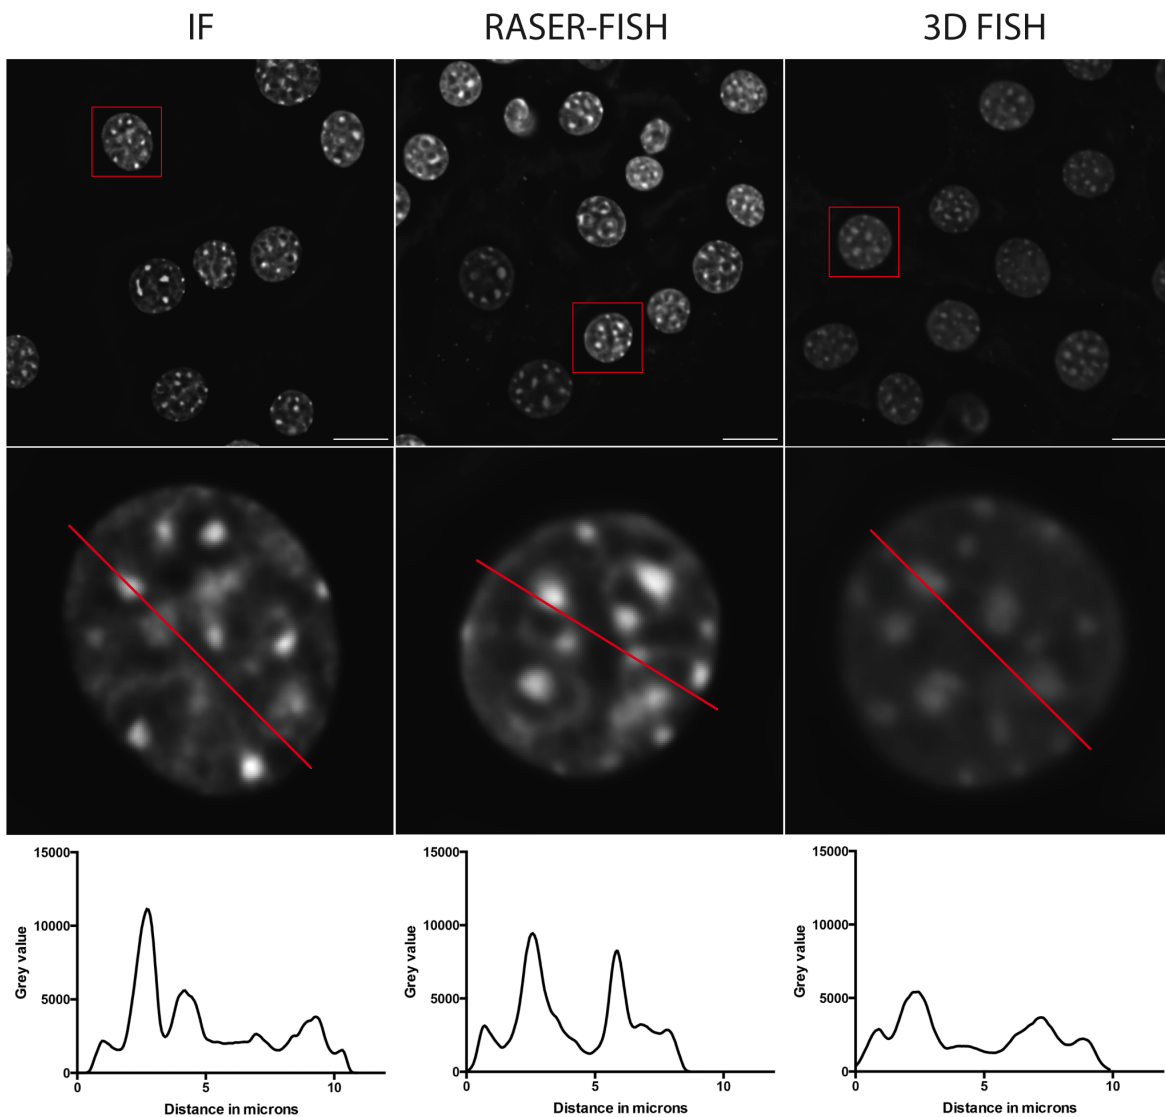

714

715

716 **Extended Data Figure 8: The RASER-FISH technique.** Example C127 DAPI-stained nuclei (top)  
717 after fixation and immunofluorescence only (left), RASER-FISH (middle) or 3D-FISH (right). Bar =  
718 10 $\mu$ m. Red box indicates selected nucleus; red line across these nuclei (middle) indicates position of  
719 line profiles (bottom) indicating fluorescence intensity across the matching nucleus, reduced after  
720 3D-FISH.

**a**

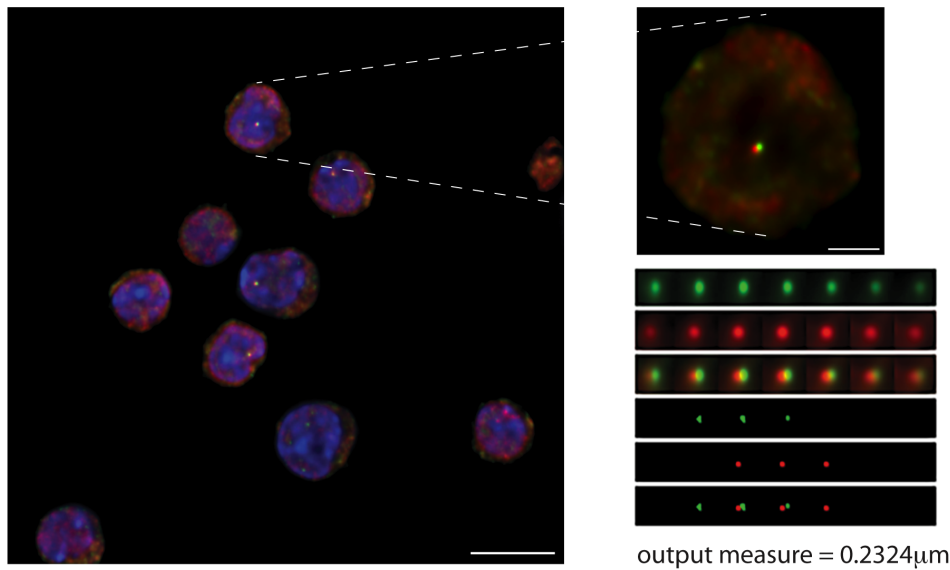

**b**

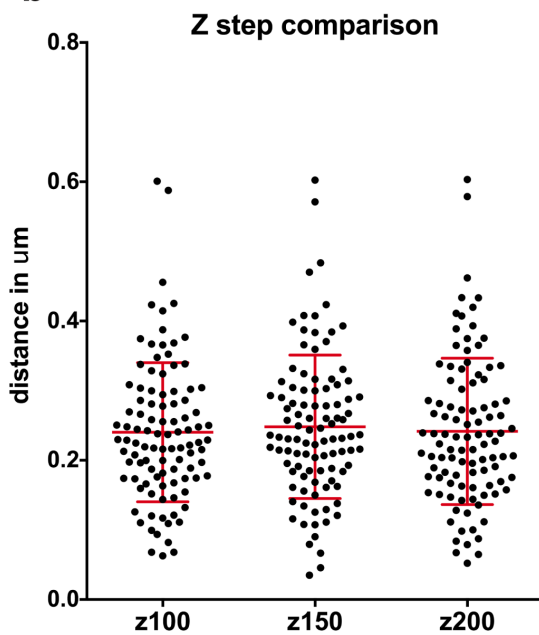

**c**

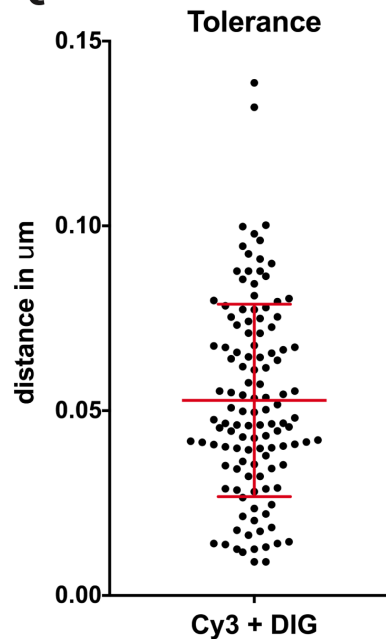

721

722

723 **Extended Data Figure 9: Image capture and analysis.** **a**, Example field of capture after  
724 deconvolution (left) with selected nucleus (right), above the sub-stack of 7 Z steps generated from  
725 the nuclear signal. The signal is thresholded at 80% of maximum fluorescence then distance  
726 between signal centroids is calculated in three dimensions after chromatic shift correction. Scale  
727 bars 10  $\mu$ m and 2  $\mu$ m. **b**, A-C distance measurements from the same signal pairs were taken after  
728 collection of the image stacks at three different Z steps; 100, 150 and 200 nm. There is no difference  
729 between the spread of data or mean values for the three data sets. n=101. **c**, The tolerance of a  
730 FISH experiment represents the distance that can be measured between different fluorescent labels  
731 to the same probe. Here we hybridised two pools of oligos for MCS-R2 directly labelled with Cy3 and



732 digoxigenin and find a mean tolerance of 53 nm, well below measurements across the  $\alpha$ -globin  
733 locus. n=121.
